# Supplementary material for: Recyclable Bi2WO6-nanoparticle mediated one-pot multicomponent reactions in aqueous medium at room temperature
Source: Royal Society of Chemistry journal article supplement (doi:10.1039/c4ra07708c), 2014-01-01

## Supporting Information

### Recyclable $\text{Bi}_2\text{WO}_6$ -nanoparticle mediated one-pot multicomponent reactions in aqueous medium at room temperature<sup>†#</sup>

BanothPaplal,<sup>a</sup> S. Nagaraju,<sup>a</sup> Palakollu Veerabhadraiah,<sup>b</sup> Kodam Sujatha,<sup>a</sup>  
Sriram Kanvah,<sup>b</sup> B. Vijaya Kumar<sup>c\*</sup> and Dhurke Kashinath<sup>a\*</sup>

<sup>a</sup>Department of Chemistry, National Institute of Technology, Warangal-506 004, India

e-mail: kashinath@nitw.ac.in; kashinath.dhurke@gmail.com

Tel. +91-870-2462677; FAX No. +91-870-2459547

<sup>b</sup>Department of Chemistry, Indian Institute of Technology, Gandhinagar, Ahmedabad, India

<sup>c</sup>Department of Chemistry, Nizam College, Osmania University, Hyderabad, India

#### *Preparation of $\text{BiVO}_4$ , $\text{Bi}_2\text{O}_3$ and $\text{Bi}_2\text{WO}_6$ :<sup>1</sup>*

The chemicals ( $\text{Bi}(\text{NO}_3)_3 \cdot 5\text{H}_2\text{O}$ ,  $\text{Na}_2\text{WO}_6$  and  $\text{V}_2\text{O}_5$ ) were analytical grade reagents (purchased from Sigma-Aldrich). A Bismuth stock solution prepared with a concentration of  $0.2 \text{ mol L}^{-1}$  by dissolving  $\text{Bi}(\text{NO}_3)_3 \cdot 5\text{H}_2\text{O}$  in  $1.5 \text{ mol L}^{-1}$  nitric acid.

**$\text{BiVO}_4$ :** 25 mL of bismuth stock solution was diluted with 25 mL of deionized water, and added Bi/V=1 molar ratio of  $\text{V}_2\text{O}_5$  and the mixture was stirred for 3 days at RT. The solid was filtered and washed with water (4 X 10 mL) and dried.

**$\text{Bi}_2\text{O}_3$ :** Conc.NaOH was added to 15 mL of Bismuth stock solution till the pH of 11.5. The solution was stirred at RT for 24h, filtered, washed with double distilled water for (4X 10 mL) and dried.

**$\text{Bi}_2\text{WO}_6$ :** Tungstate solution was prepared by dissolving sodium tungstate in  $\text{HNO}_3$  ( $1.5 \text{ molL}^{-1}$ ). Bismuth and tungstate stock solution was mixed with Bi/W = 2 (in the molar ratio of Bi/W = 2), this solution was transferred in to a Teflon lined autoclave and then heated at  $200^\circ\text{C}$  for 24h under autogenous pressure. After 24h, autoclave was cooled to RT and the compound obtained was washed with deionized water (4x10 mL) and dried.

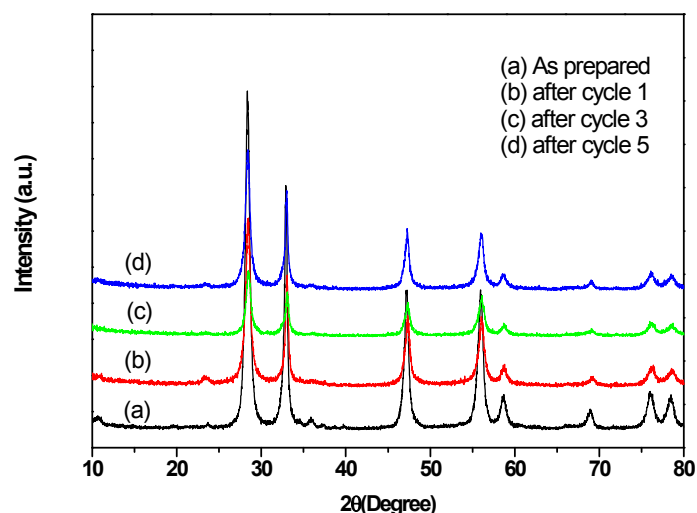

Figure-1. Powder XRD graph of  $\text{Bi}_2\text{WO}_6$  (Before the reaction and after the reaction up to 5 cycles)

**General procedure for the synthesis of Dihydropyridines (4-17):**

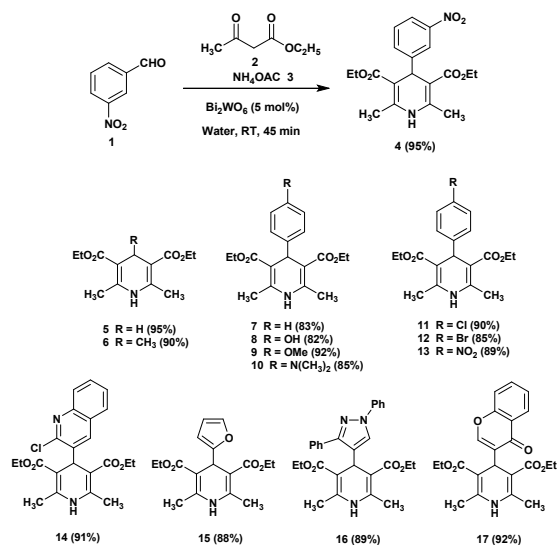

To a mixture of aldehyde (1 equiv), and Ethyl acetoacetate (2 equiv) in water (3-5 mL) was added  $\text{NH}_4\text{OAc}$  (2.5 equiv) followed by  $\text{Bi}_2\text{WO}_6$  (5 mol%). The mixture was stirred at RT for 60 min. After completion of the reaction (monitored by TLC), the contents were transferred to separating funnel and extracted with EtOAc (3X 10 mL). The combined organic layers were washed with brine, water, dried over  $\text{Na}_2\text{SO}_4$  and filtered. Evaporation of the solvent gave the crude product which was purified by recrystallization using EtOH as solvent (Some of the derivatives were purified using

silica gel column chromatography. Elution of the column with Petroleum ether:EtOAc mixture gave the desired dihydropyridines 4-17).

| Product No | Measured MP °C | Reported MP °C        |
|------------|----------------|-----------------------|
| 6          | 125-128        | 130 <sup>2b</sup>     |
| 7          | 158-160        | 156–158 <sup>2a</sup> |
| 8          | 238-240        | 240-242 <sup>2c</sup> |
| 9          | 159-161        | 158–160 <sup>2a</sup> |
| 10         | 228-230        | 227-230 <sup>2c</sup> |
| 11         | 148-150        | 145–147 <sup>2a</sup> |
| 12         | 162-164        | 162–164 <sup>2a</sup> |
| 13         | 132-133        | 130–132 <sup>2a</sup> |
| 15         | 160-162        | 160–162 <sup>2a</sup> |

**Table-1.** Comparison of physical data (MP) of the known compounds

**General procedure for the synthesis of polyhydroquinolones (19-31):**

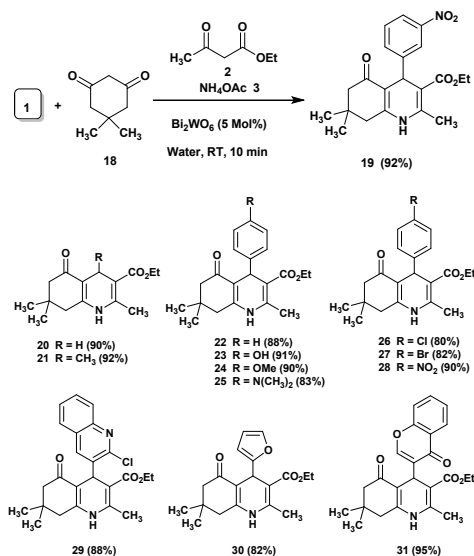

To a mixture of aldehyde (1 equiv), ethyl acetoacetate (1equiv) and dimedone (1 equiv) in water (3-5 mL) was added  $\text{NH}_4\text{OAc}$  (2.5 equiv) followed by  $\text{Bi}_2\text{WO}_6$  (5 mol%). The mixture was stirred at RT for 10 min. After completion of the reaction (monitored by TLC), the contents were transferred to separating funnel and extracted with EtOAc (3X 10 mL). The combined organic layers were washed with brine, water, dried over  $\text{Na}_2\text{SO}_4$  and filtered. Evaporation of the solvent gave the crude product

which was purified by recrystallization using EtOH as solvent (Some of the derivatives were purified using silica gel column chromatography. Elution of the column with Petroleum ether:EtOAc mixture gave the desired products).

| Product No | Measured MP °C | Reported MP °C        |
|------------|----------------|-----------------------|
| <b>19</b>  | 178-180        | 174–176 <sup>3a</sup> |
| <b>22</b>  | 205-206        | 202–204 <sup>3a</sup> |
| <b>23</b>  | 234-235        | 231–233 <sup>3a</sup> |
| <b>24</b>  | 250-254        | 255–257 <sup>3a</sup> |
| <b>25</b>  | 233-235        | 230–232 <sup>3a</sup> |
| <b>26</b>  | 240-245        | 245–247 <sup>3a</sup> |
| <b>27</b>  | 251-253        | 252–253 <sup>3a</sup> |
| <b>28</b>  | 242-246        | 244–246 <sup>3a</sup> |
| <b>30</b>  | 246-248        | 246–248 <sup>3a</sup> |

**Table-2.** Comparison of physical data (MP) of the known compounds

**General procedure for the synthesis of 4H-chromenederivatives (33-45):**

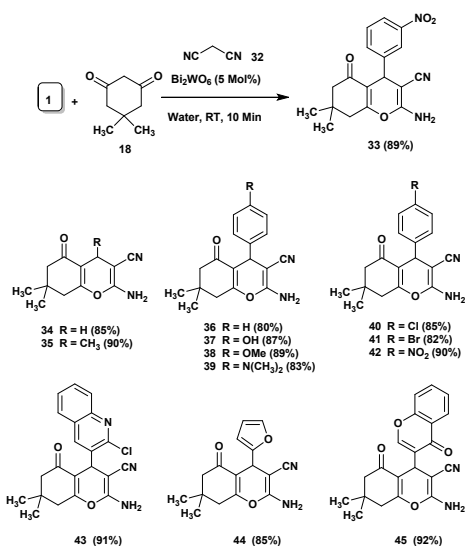

To a mixture of aldehyde (1 equiv), and dione (1 equiv) in water (3-5 mL) was added melanonitrile (1 equiv) followed by Bi<sub>2</sub>WO<sub>6</sub> (5 mol%). The mixture was stirred at RT for 10 min. After completion of the reaction (monitored by TLC), the contents were transferred to separating funnel and extracted with EtOAc (3X 10 mL). The combined organic layers were washed with brine, water, dried over Na<sub>2</sub>SO<sub>4</sub> and

filtered. Evaporation of the solvent gave the crude product which was purified by recrystallization using EtOH as solvent (Some of the derivatives were purified using silica gel column chromatography. Elution of the column with Petroleum ether:EtOAc mixture gave the desired products).

| Product No. | Measured MP °C | Reported MP °C        |
|-------------|----------------|-----------------------|
| <b>33</b>   | 214-216        | 210–212 <sup>4a</sup> |
| <b>34</b>   | 190-192        | --                    |
| <b>36</b>   | 228-230        | 224–226 <sup>4a</sup> |
| <b>37</b>   | 210-212        | 212–215 <sup>4a</sup> |
| <b>38</b>   | 193-195        | 190–192 <sup>4a</sup> |
| <b>39</b>   | 208-210        | 206–208 <sup>4a</sup> |
| <b>40</b>   | 207-210        | 210–212 <sup>4a</sup> |
| <b>41</b>   | 215-218        | 216-218 <sup>4a</sup> |
| <b>42</b>   | 183-184        | 186-189 <sup>4a</sup> |
| <b>44</b>   | 210-213        | 200–204 <sup>4a</sup> |

**Table-3.** Comparison of physical data (MP) of the known compounds

**General procedure for the synthesis of 2-amino-4H-benzo[b]pyran derivatives (47-60):**

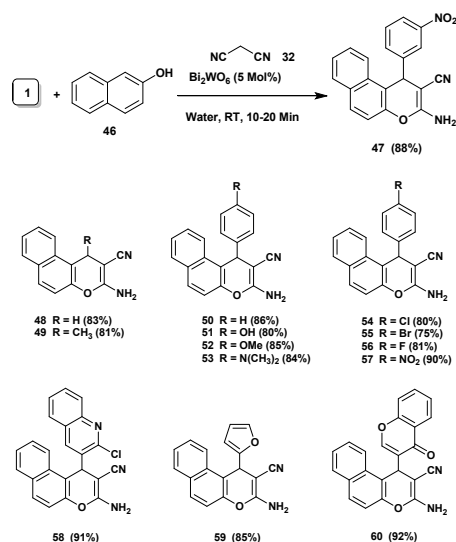

To a mixture of aldehyde (1 equiv), and β-naphthol (1 equiv) in water (3-5 mL) was added melanonitrile (1 equiv) followed by Bi<sub>2</sub>WO<sub>6</sub> (5 mol%). The mixture was stirred at RT for 20 min. After completion of the reaction (monitored by TLC), the contents

were transferred to separating funnel and extracted with EtOAc (3X 10 mL). The combined organic layers were washed with brine, water, dried over Na<sub>2</sub>SO<sub>4</sub> and filtered. Evaporation of the solvent gave the crude product which was purified by recrystallization using EtOH as solvent (Some of the derivatives were purified using silica gel column chromatography. Elution of the column with Petroleum ether:EtOAc mixture gave the desired products).

| Product No | Measured MP °C | Reported MP °C        |
|------------|----------------|-----------------------|
| 47         | 209-211        | 233–235 <sup>4a</sup> |
| 48         | 200-202        | --                    |
| 49         | 170-175        | --                    |
| 50         | 276-278        | 274–276 <sup>4a</sup> |
| 51         | 245-246        | 246–248 <sup>4a</sup> |
| 52         | 216-218        | 217–218 <sup>4a</sup> |
| 53         | 225-228        | 227-230 <sup>4a</sup> |
| 54         | 204-205        | 205–206 <sup>4a</sup> |
| 55         | 240-242        | 242–244 <sup>4a</sup> |
| 56         | 232-234        | 233–234 <sup>4a</sup> |
| 57         | 184-185        | 186–187 <sup>4a</sup> |
| 58         | 260-263        | --                    |
| 59         | 226-228        | 226–227 <sup>4b</sup> |

**Table-4.** Comparison of physical data (MP) of the known compounds

**References:**

1. (a) T. Saison, P. Gras, N. Chemin, C. Chanéac, O. Durupthy, V. Brezová, C. Colbeau–Justin, J.–P. Jolivet, *J. Phys. Chem. C*, **2013**, *117*, 22656–22666; (b) B. V. Kumar, N. K. Veldurthi, J. R. Reddy, M. Vithal, *Micro & NanoLett.*, **2012**, *7*, 544–548.
2. (a) A. Debache, W. Ghalem, R. Boulcina, B. Ali, S. Rhouati, B. Carboni, *Tetrahedron Lett.*, **2009**, *50*, 5248–5250; (b) S. Ghosh, F. Saikh, J. Das, A. K. Pramanik, *Tetrahedron Lett.*, **2013**, *54*, 58–62; (c) P. Ghosh, P. Mukherjee, Asish, R. Das, *RSC Adv.*, **2013**, *3*, 8220–8226.
3. (a) S. B. Sapkal, K. F. Shelke, B. B. Shingate, M. S. Shingare, *Tetrahedron Lett.*, **2009**, *50*, 1754–1756.

4. J. K Rajput, G. Kaur, *Catal. Sci. Technol.*, 2014, 4, 142–151.
5. (a) J. Albadi, A. Mansournezhad, M. Darvishi-Paduk, *Chin. Chem. Lett.*, 2013, 24, 208–210; (b) K. Gong, H.-L. Wang, D. Fang, Z.-L. Liu, *Catal. Commun.*, 2008, 9, 650–653.

### Diethyl 2,6-dimethyl-1,4-dihydropyridine-3,5-dicarboxylate (5):

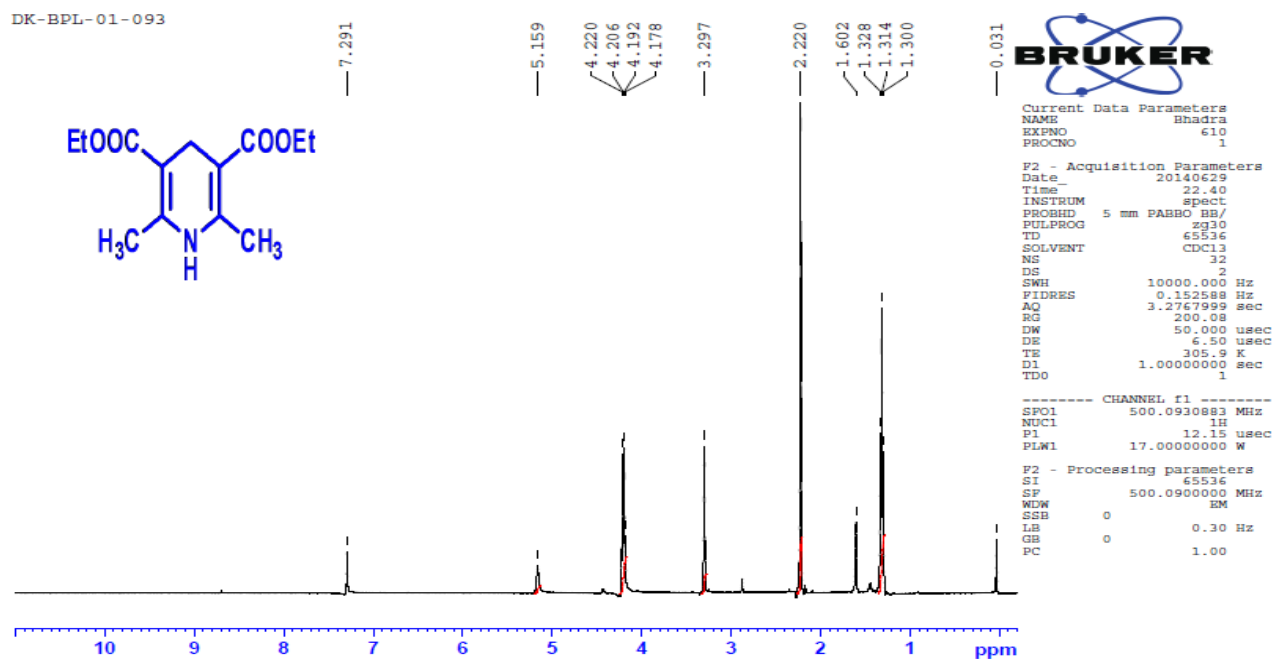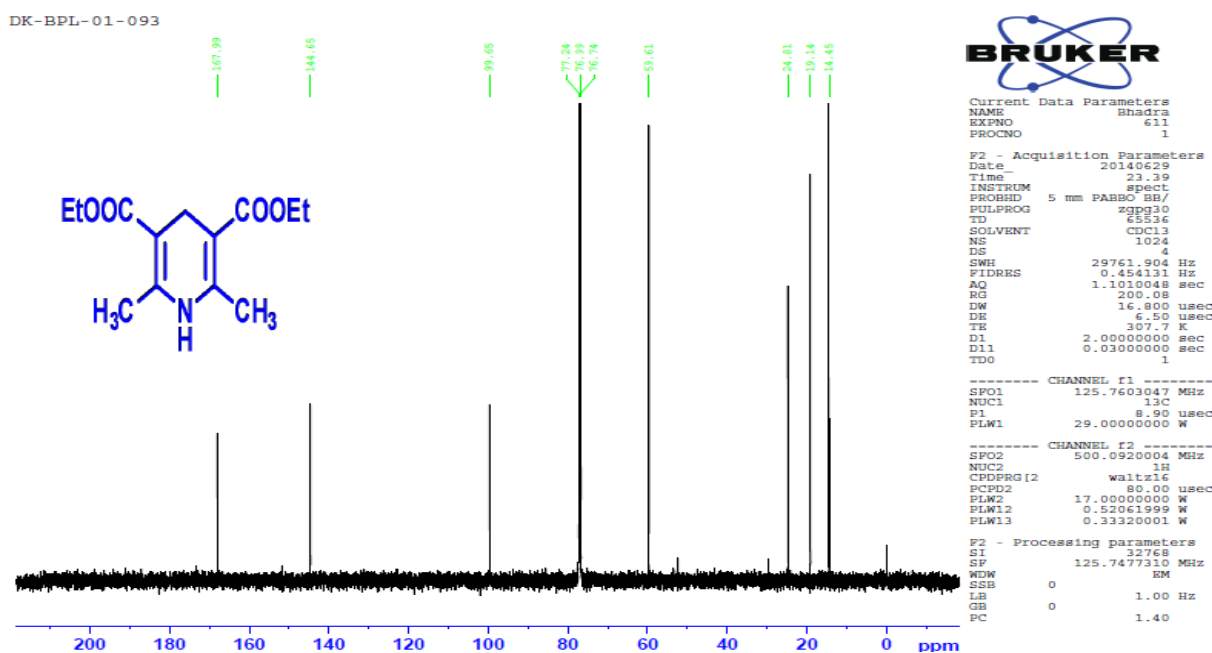

9310.38703346

Indian Institute of Technology, Gandhinagar0.00000000

SYNAPT G2-S#NotSet  
10-Jul-201422:57:26  
1: TOF MS ES+  
3.64e5

IITGN\_100714\_009 1192 (10.387)  
252.1187

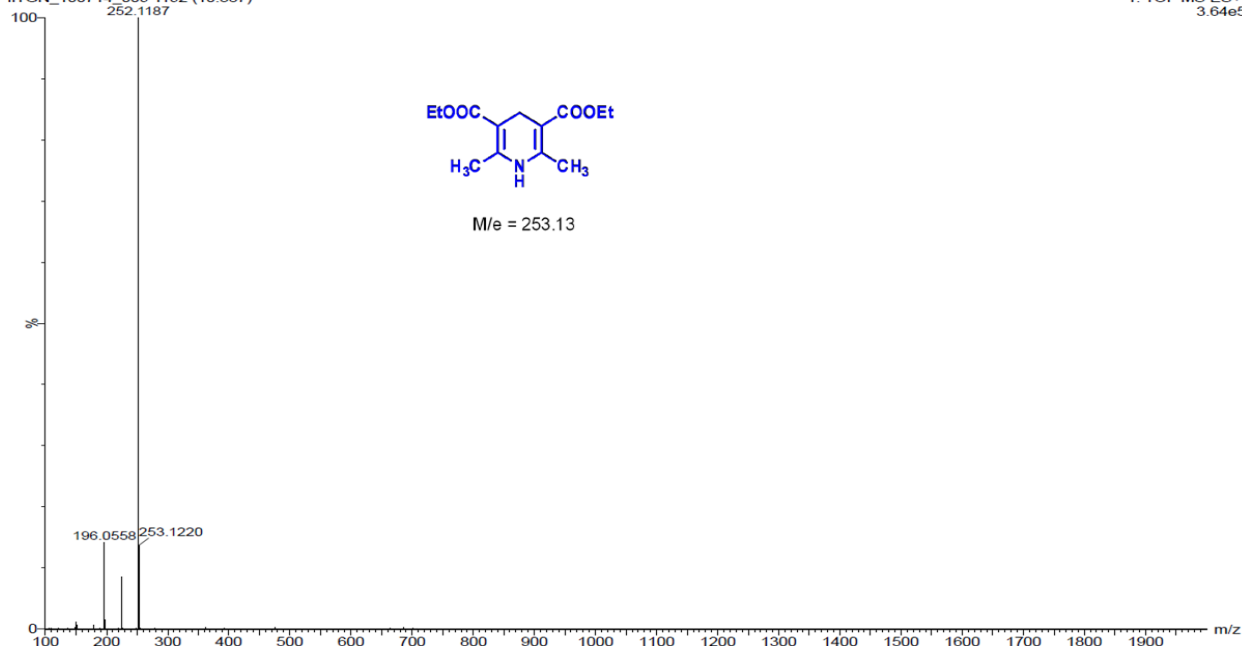

### Diethyl 2,4,6-trimethyl-1,4-dihydropyridine-3,5-dicarboxylate (6):

DK-BPL-01-094

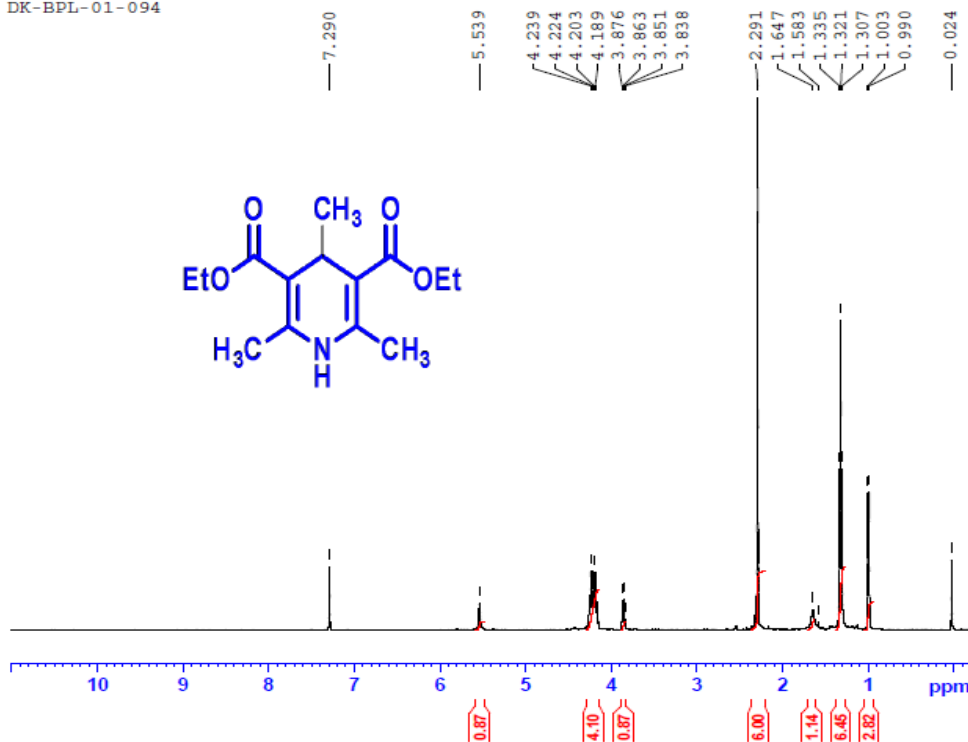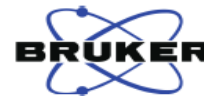

Current Data Parameters  
NAME Bhadra  
EXPNO 673  
PROCNO 1

F2 - Acquisition Parameters  
Date\_ 20140710  
Time\_ 17.32  
INSTRUM spect  
PROBHD 5 mm PABBO BB/  
PULPROG zg30  
TD 65536  
SOLVENT CDCl3  
NS 32  
DS 2  
SWH 10000.000 Hz  
FIDRES 0.152588 Hz  
AQ 3.2767999 sec  
RG 200.08  
DW 50.000 usec  
DE 6.50 usec  
TE 296.2 K  
D1 1.00000000 sec  
TDO 1

----- CHANNEL f1 -----  
SFO1 500.0930883 MHz  
NUC1 1H  
P1 12.15 usec  
PLW1 17.00000000 W

F2 - Processing parameters  
SI 65536  
SF 500.0900000 MHz  
WDW EM  
SSB 0  
LB 0.30 Hz  
GB 0  
PC 1.00



DK-BPL-01-094

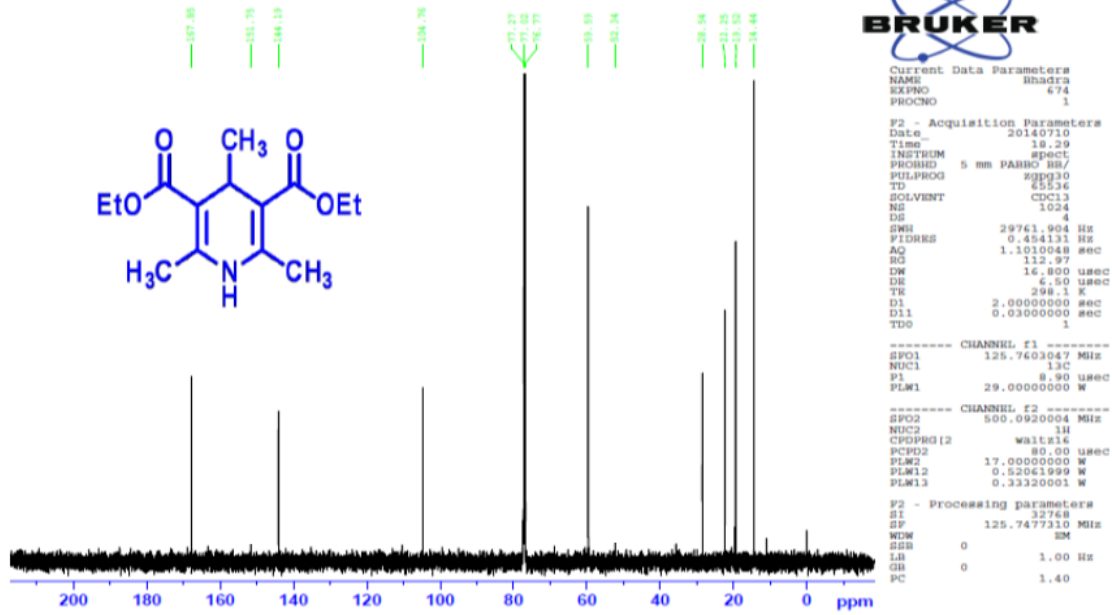

**Diethyl 4-(2-chloroquinolin-3-yl)-2,6-dimethyl-1,4-dihydropyridine-3,5-dicarboxylate (14):**

DK-BPL-01-050

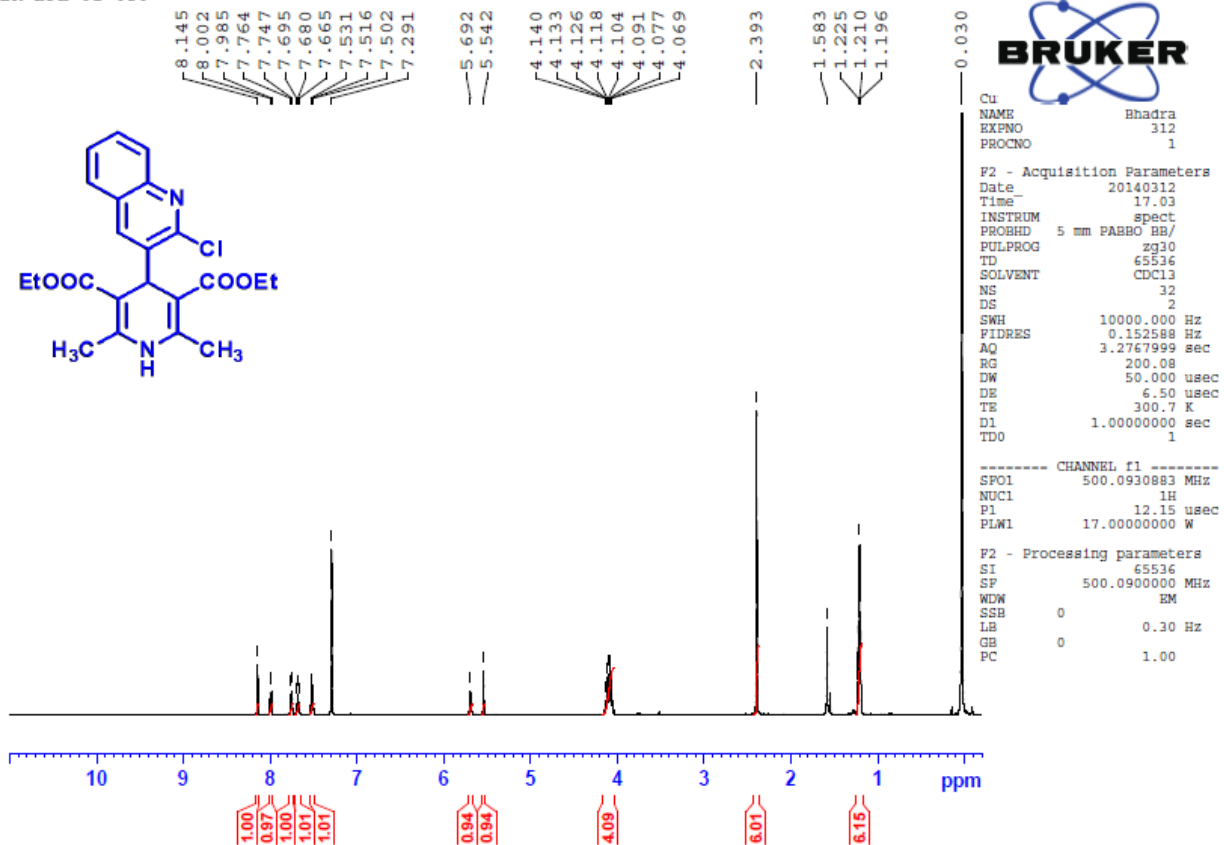

DK-BPL-01-50

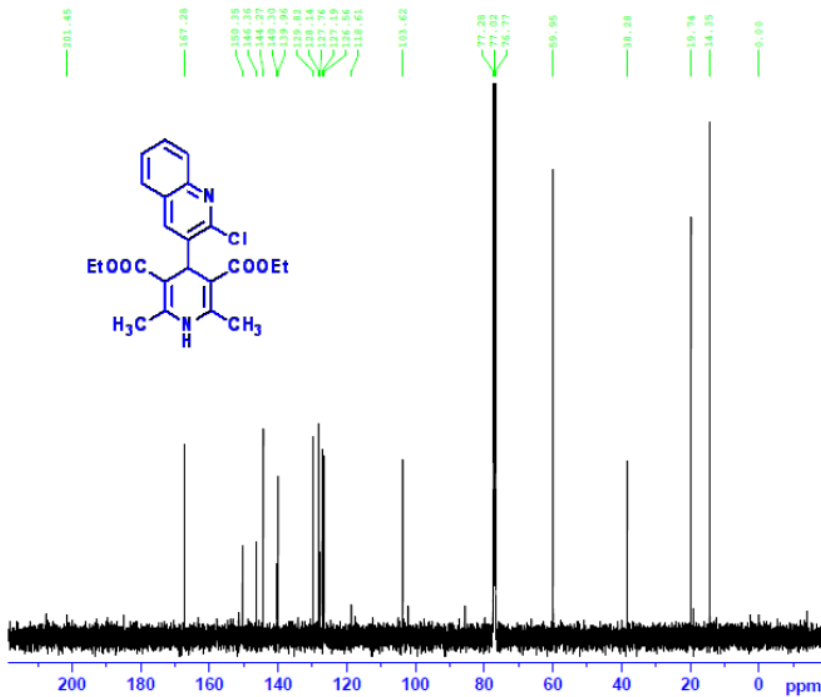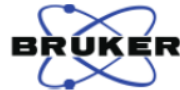

Current Data Parameters  
 NAME Bhadra  
 EXPNO 549  
 PROCNO 1

F2 - Acquisition Parameters  
 Date 20140708  
 Time 23.54  
 INSTRUM spect  
 PROBRD 5 mm PABBO BB/  
 PULPROG zgpg30  
 TD 65536  
 SOLVENT CDCl3  
 NS 1500  
 DS 4  
 SWH 29761.904 Hz  
 FIDRES 0.454131 Hz  
 AQ 1.1010048 sec  
 RG 112.97  
 DW 16.800 usec  
 DE 6.50 usec  
 TE 297.9 K  
 D1 2.0000000 sec  
 D11 0.0300000 sec  
 TDO 1

----- CHANNEL f1 -----  
 SP01 125.7603047 MHz  
 NUC1 13C  
 P1 8.90 usec  
 PLW1 29.0000000 W

----- CHANNEL f2 -----  
 SP02 500.0920004 MHz  
 NUC2 1H  
 CPDPRG2 waltz16  
 PCPD2 80.00 usec  
 PLM2 17.0000000 W  
 PLW2 0.52061999 W  
 PLM13 0.33320001 W

F2 - Processing parameters  
 SI 32768  
 SF 125.7477310 MHz  
 WDW EM  
 SSB 0  
 LB 1.00 Hz  
 GB 0  
 PC 1.40

NAG 5010.90168381

Indian Institute of Technology, Gandhinagar.0.00000000

SYNAPT G2-S#NotSet  
01-Jun-201422:32:26  
1: TOF MS ES+  
1.52e7

IITGN\_MIX\_280514\_013 2435 (10.902) Cm (2422:2453)

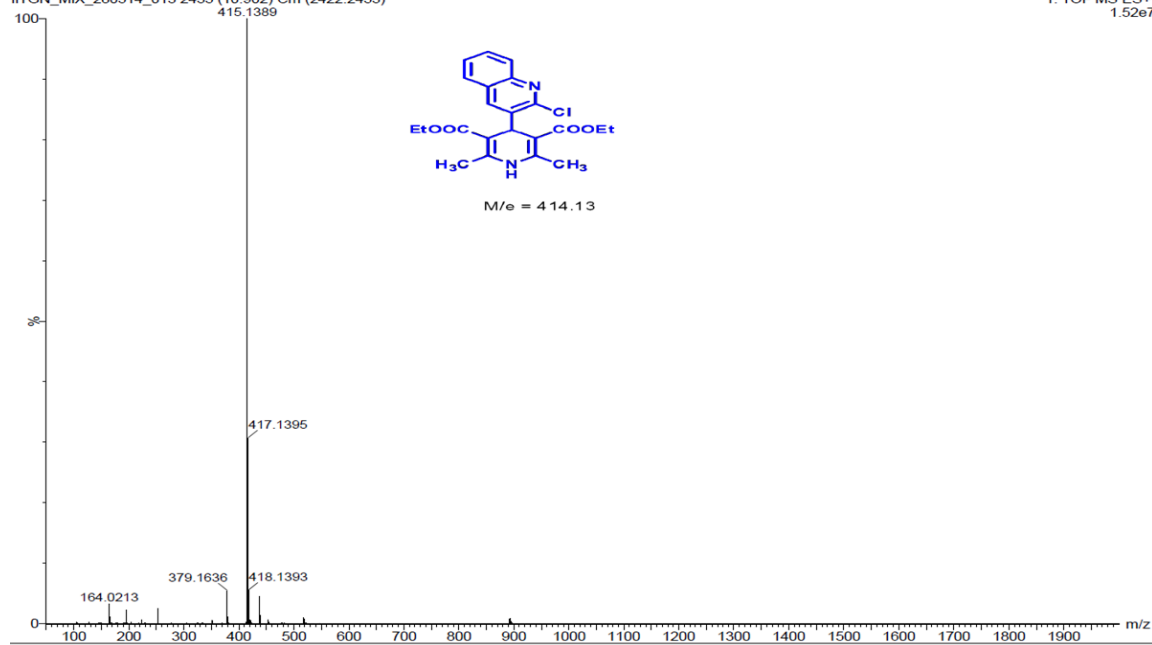

# Diethyl 4-(1, 3 diphenyl-1*H*-pyrazole-4-yl)-2,6-dimethyl-1,4dihydropyridine-3,5-dicarboxylate(16):

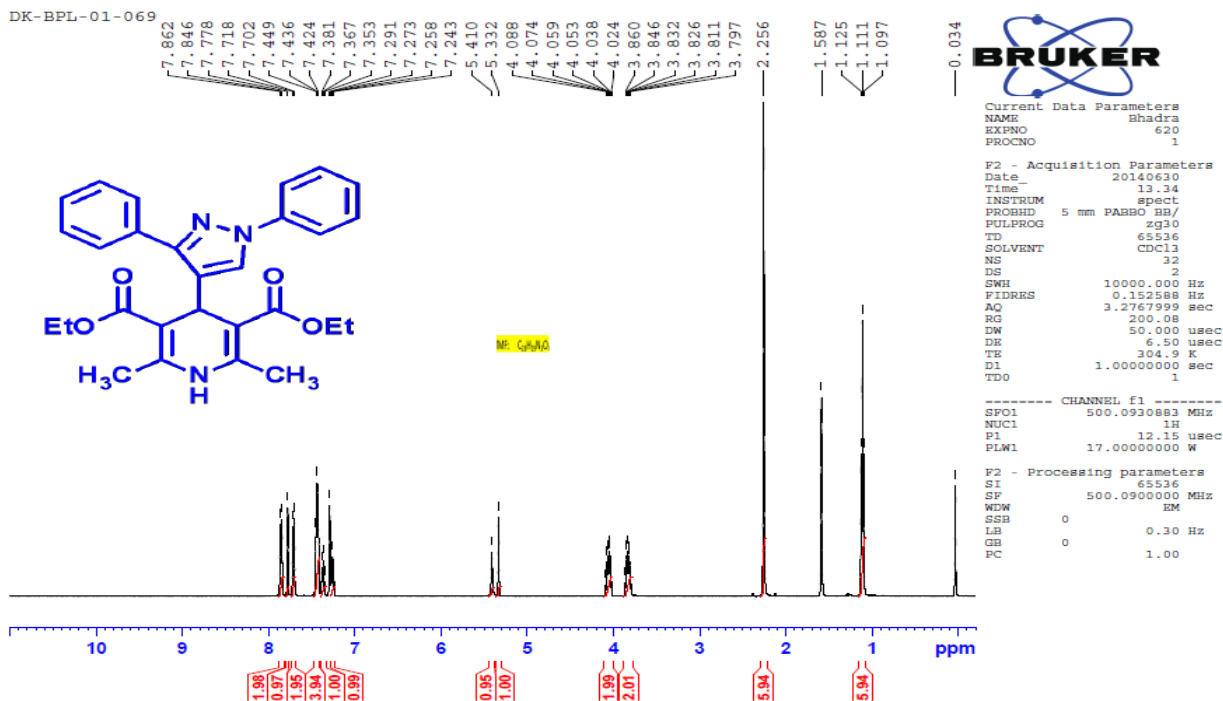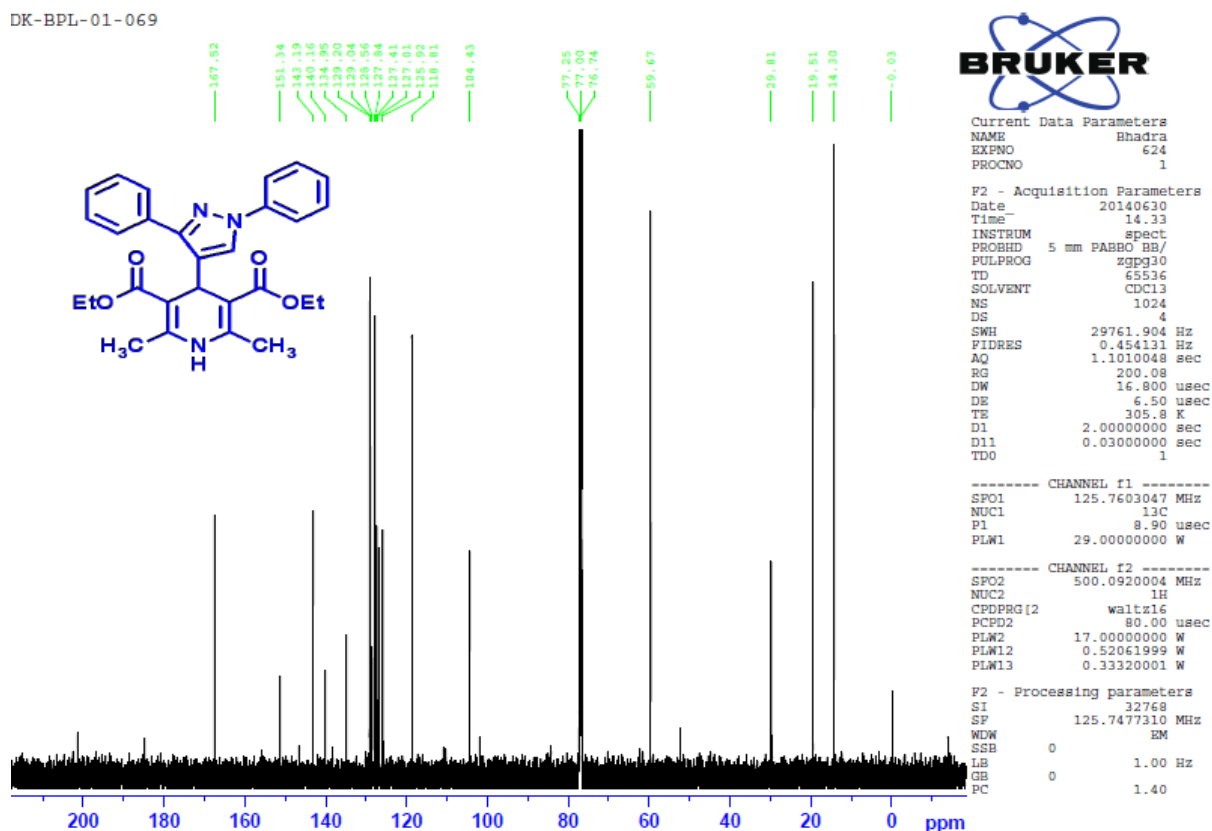

5911.94236660

Indian Institute of Technology, Gandhinagar0.00000000

SYNAPT G2-S#NotSet  
10-Jul-201422:36:38  
1: TOF MS ES+  
1.02e6

IITGN\_100714\_008 1370 (11.942)

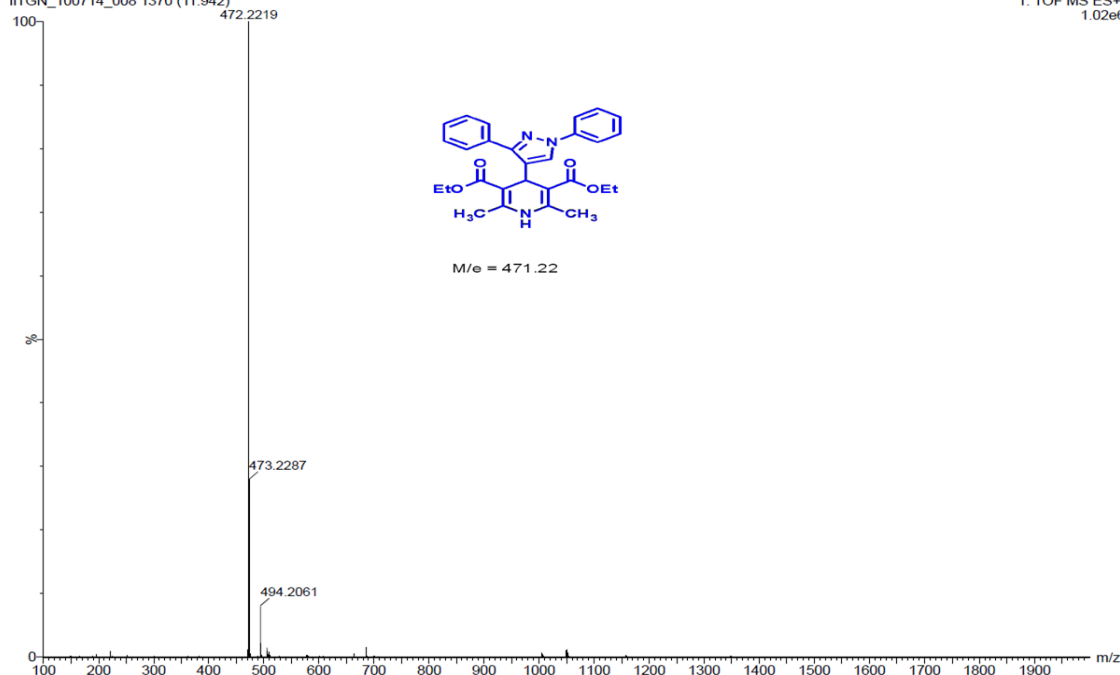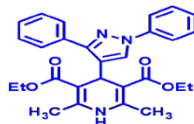

M/e = 471.22

### Diethyl 2, 6-dimethyl-4-(4-oxo-4H-chromene-3-yl)-1,4-dihydropyridine-3,5-dicarboxylate(17):

DK-BPL-01-051

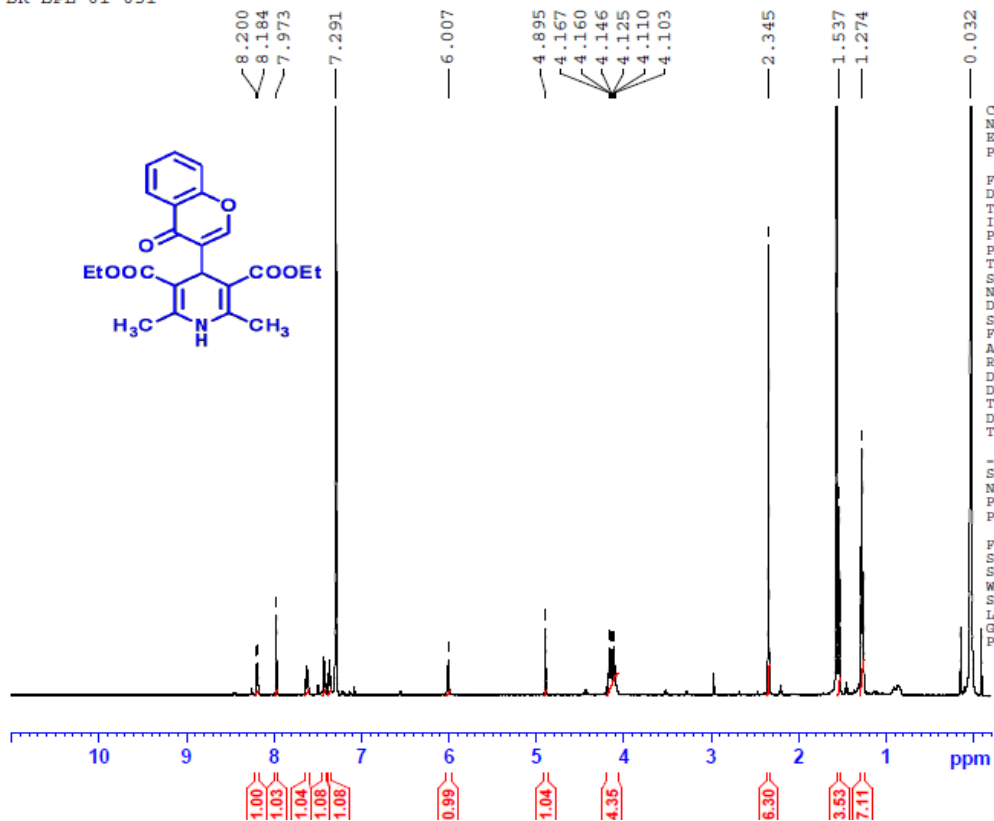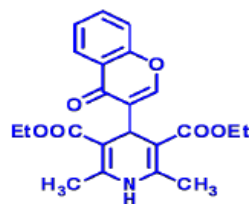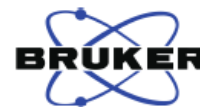

Current Data Parameters  
NAME Bhadra  
EXPNO 556  
PROCNO 1

F2 - Acquisition Parameters  
Date\_ 20140313  
Time\_ 14.59  
INSTRUM spect  
PROBHD 5 mm PABBO BB/  
PULPROG zg30  
TD 65536  
SOLVENT CDCl3  
NS 256  
DS 2  
SWH 10000.000 Hz  
FIDRES 0.152588 Hz  
AQ 3.2767999 sec  
RG 200.08  
DW 50.000 usec  
DE 6.50 usec  
TE 300.9 K  
D1 1.00000000 sec  
TDO 1

----- CHANNEL f1 -----  
SFO1 500.0930883 MHz  
NUC1 1H  
P1 12.15 usec  
PLW1 17.00000000 W

F2 - Processing parameters  
SI 65536  
SF 500.0900000 MHz  
WDW EM  
SSB 0  
LB 0.30 Hz  
GB 0  
PC 1.00

DK-BPL-01-051

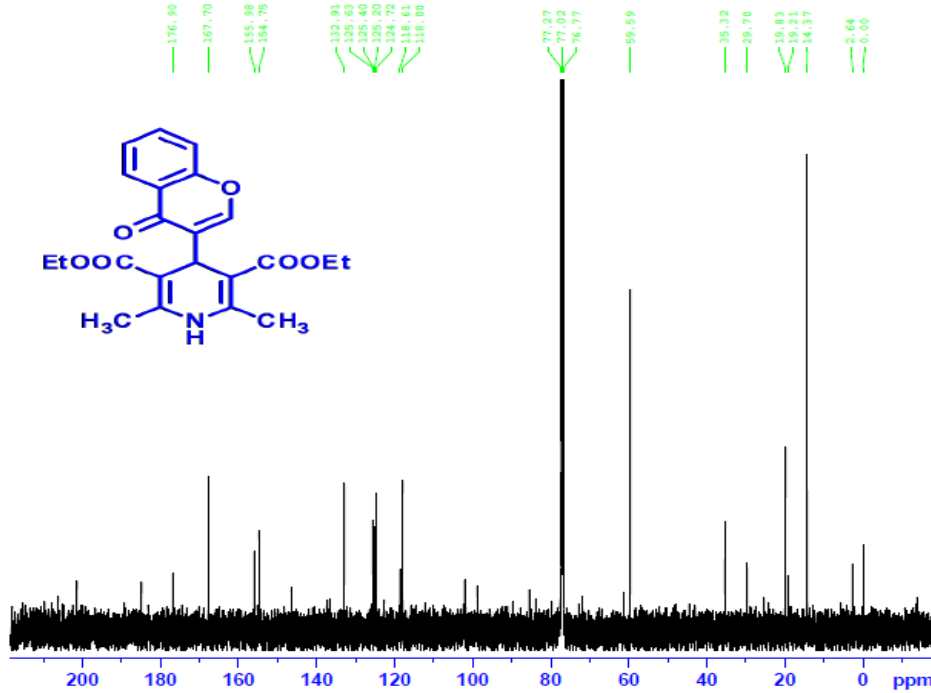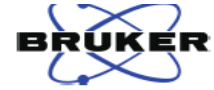

Current Data Parameters  
 NAME Shadra  
 EXPNO 810  
 PROCNO 1

F2 - Acquisition Parameters  
 Date 20140711  
 Time 11.33  
 INSTRUM spect  
 PROBHD 5 mm PABBO BB/  
 PULPROG zgpg30  
 TD 65536  
 SOLVENT CDCl3  
 NS 1500  
 DS 4  
 SWH 29761.904 Hz  
 FIDRES 0.454131 Hz  
 AQ 1.1010048 sec  
 RG 112.97  
 DW 16.800 usec  
 DE 6.50 usec  
 TE 298.2 K  
 D1 2.00000000 sec  
 D11 0.03000000 sec  
 TDO 1

----- CHANNEL f1 -----  
 SFO1 125.7603047 MHz  
 NUC1 13C  
 P1 8.90 usec  
 PLW1 29.00000000 W

----- CHANNEL f2 -----  
 SFO2 500.0920004 MHz  
 NUC2 1H  
 CPDPRG[2] waltz16  
 PCPD2 80.00 usec  
 PLW2 17.00000000 W  
 PLW12 0.52061998 W  
 PLW13 0.33320001 W

F2 - Processing parameters  
 SI 32768  
 SF 125.7477310 MHz  
 WDW EM  
 SSB 0  
 LB 1.00 Hz  
 GB 0  
 PC 1.40

**Ethyl 2,4,7,7-tetramethyl-5-oxo-1,4,5,6,7,8-hexahydroquinoline-3-carboxylate(21):**

DK-BPL-01-106

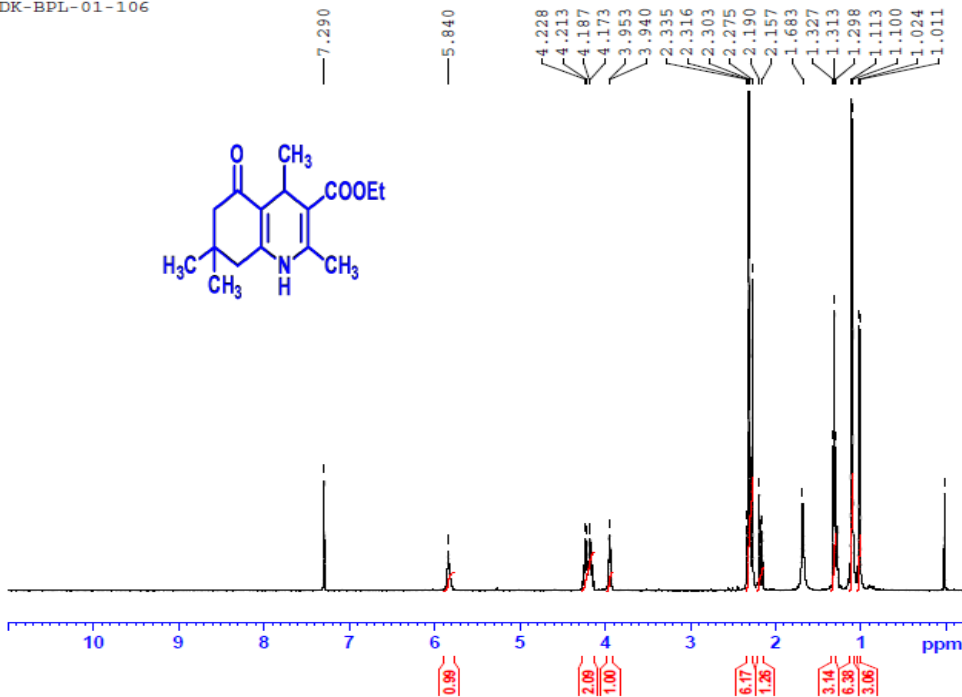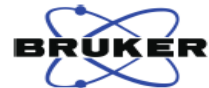

Current Data Parameters  
 NAME Shadra  
 EXPNO 718  
 PROCNO 1

F2 - Acquisition Parameters  
 Date 20140712  
 Time 9.41  
 INSTRUM spect  
 PROBHD 5 mm PABBO BB/  
 PULPROG zg30  
 TD 65536  
 SOLVENT CDCl3  
 NS 32  
 DS 2  
 SWH 10000.000 Hz  
 FIDRES 0.152588 Hz  
 AQ 3.2767999 sec  
 RG 200.08  
 DW 50.000 usec  
 DE 6.50 usec  
 TE 296.3 K  
 D1 1.00000000 sec  
 TDO 1

----- CHANNEL f1 -----  
 SFO1 500.0930883 MHz  
 NUC1 1H  
 P1 12.15 usec  
 PLW1 17.00000000 W

F2 - Processing parameters  
 SI 65536  
 SF 500.0900000 MHz  
 WDW EM  
 SSB 0  
 LB 0.30 Hz  
 GB 0  
 PC 1.00

DK-BPL-01-106

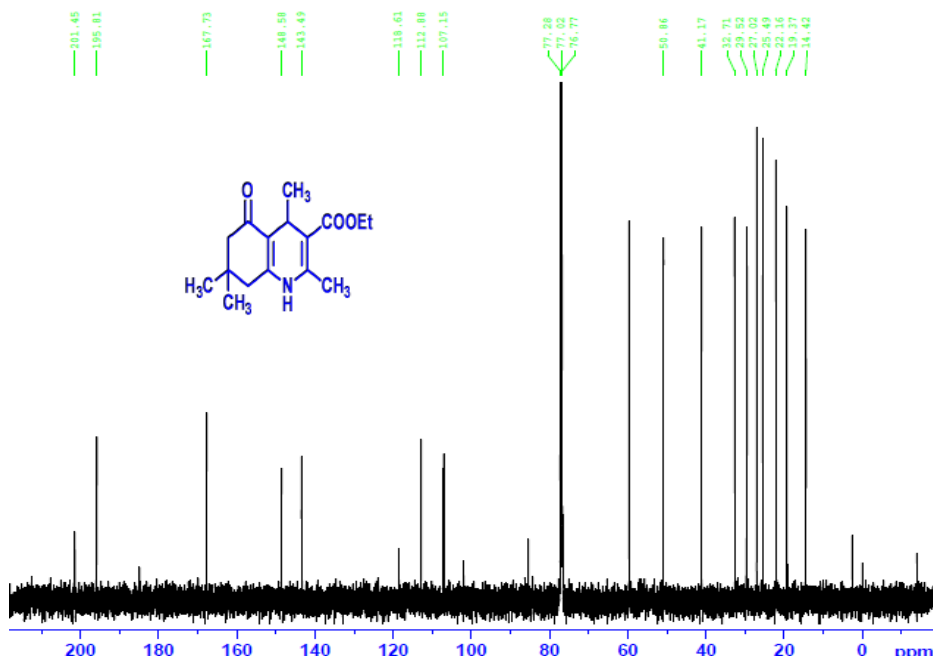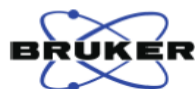

Current Data Parameters  
 NAME Rhadra  
 EXPNO 719  
 PROCNO 1

F2 - Acquisition Parameters  
 Date 20140712  
 Time 10.41  
 INSTRUM spect  
 PROBHD 5 mm PABBO BB/  
 PULPROG zgpg30  
 TD 65536  
 SOLVENT CDCl3  
 NS 1024  
 DS 4  
 SWH 29761.904 Hz  
 FIDRES 0.454131 Hz  
 AQ 1.1010048 sec  
 RG 112.97  
 DW 16.800 usec  
 DE 6.50 usec  
 TE 298.2 K  
 D1 2.0000000 sec  
 D11 0.0300000 sec  
 TDO 1

----- CHANNEL f1 -----  
 SFO1 125.7603047 MHz  
 NUC1 13C  
 P1 8.90 usec  
 PLW1 29.0000000 W

----- CHANNEL f2 -----  
 SFO2 500.0920004 MHz  
 NUC2 1H  
 CDPORG2 waltz16  
 PCPD2 80.00 usec  
 PLW2 17.0000000 W  
 PLW12 0.52061999 W  
 PLW13 0.33320001 W

F2 - Processing parameters  
 SI 32768  
 SF 125.7477310 MHz  
 WDW EM  
 SSB 0  
 LB 1.00 Hz  
 GB 0  
 PC 1.40

068.96673298

Indian Institute of Technology, Gandhinagar0.0000000

SYNAPT G2-S#NotSet  
 12-Jul-201414:56:15  
 1: TOF MS ES+  
 7.51e5

ITGN\_MIX\_070714\_051 1028 (8.967) Cm (1027:1029-(1009:1020+1036:1057))

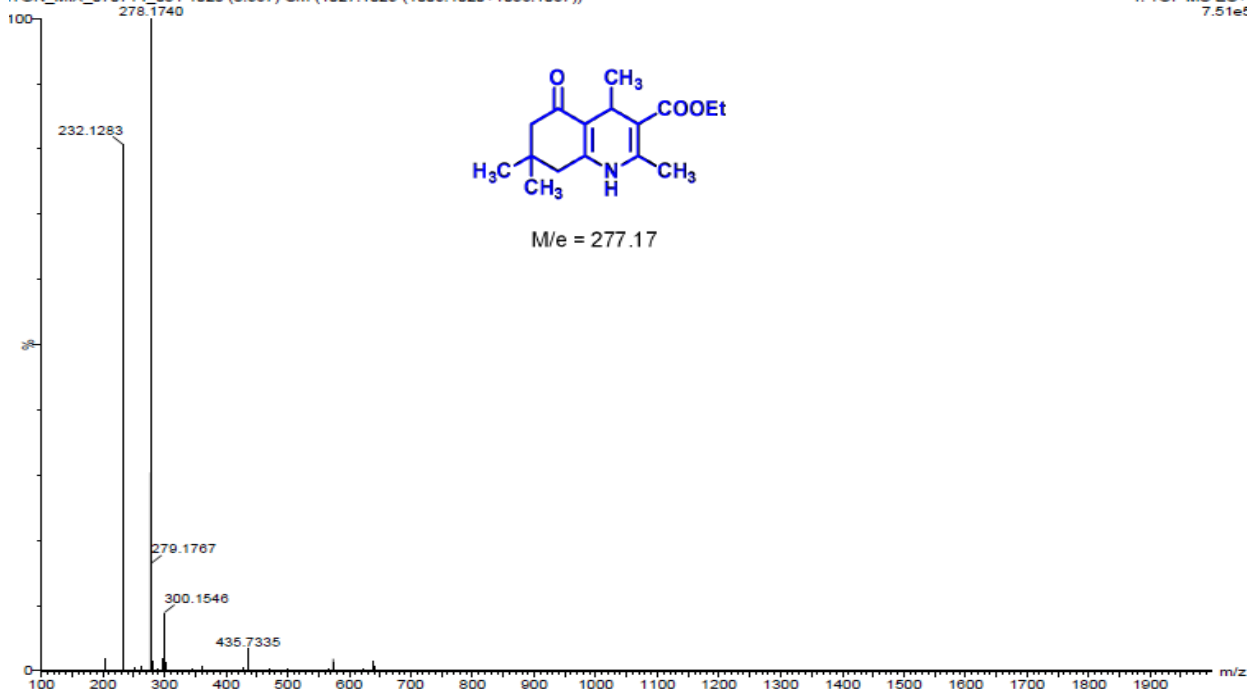

**Ethyl 2-chloro-2,7,7-trimethyl-5-oxo-1,4,5,6,7,8-hexahydro-(3,4-biquinoline)-3-carboxylate (29):**

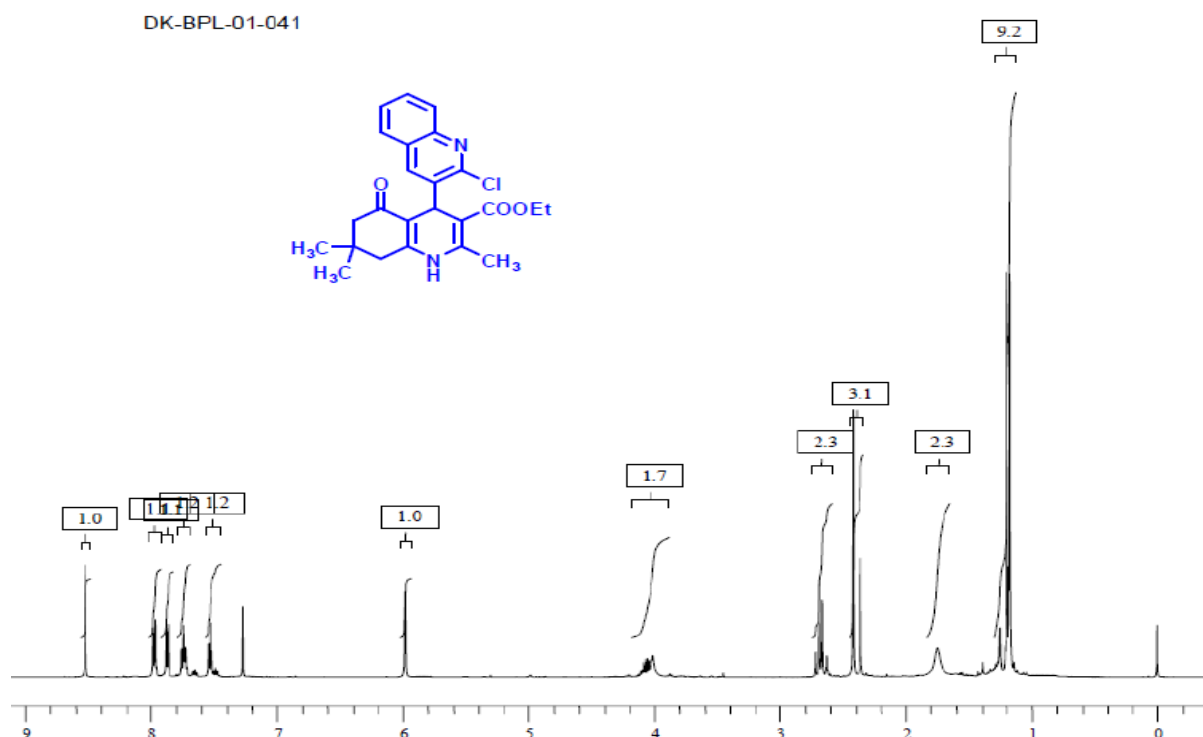

DK-BPL-01-041

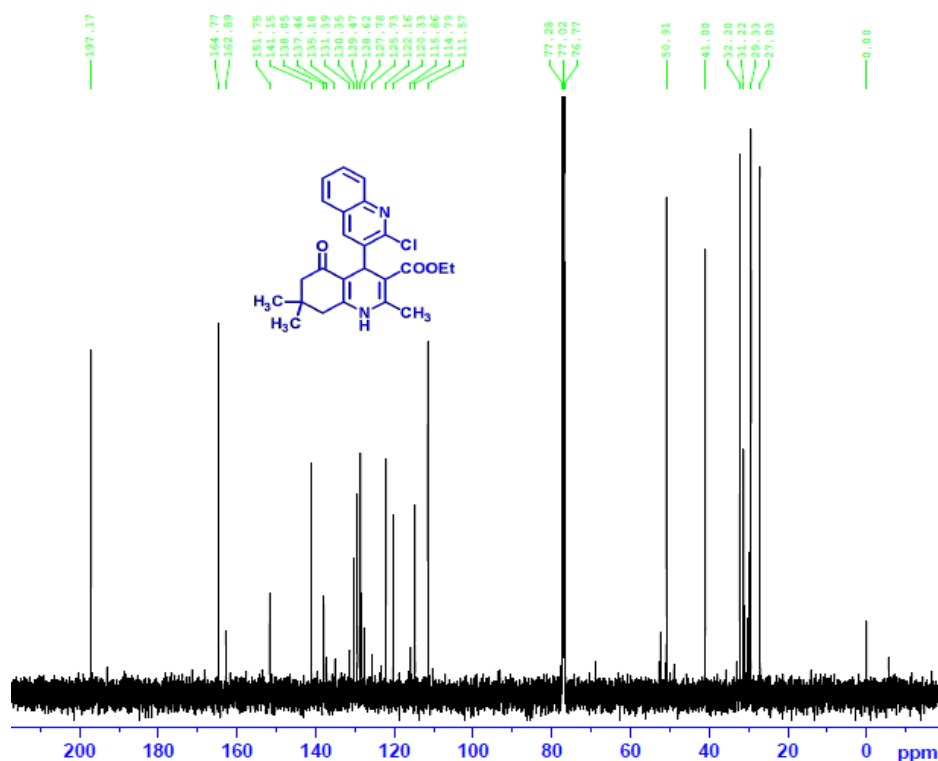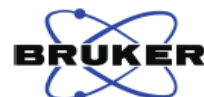

Current Data Parameters  
 NAME Bhadra  
 EXPNO 676  
 PROCNO 1

F2 - Acquisition Parameters  
 Date\_ 20140710  
 Time 20.10  
 INSTRUM spect  
 PROBHD 5 mm PABBO BB/  
 PULPROG zgpg30  
 TD 65536  
 SOLVENT CDCl3  
 NS 1024  
 DS 4  
 SWH 29761.904 Hz  
 FIDRES 0.454131 Hz  
 AQ 1.1010048 sec  
 RG 112.97  
 DW 16.800 usec  
 DE 6.50 usec  
 TE 298.4 K  
 D1 2.00000000 sec  
 D11 0.03000000 sec  
 TDO 1

----- CHANNEL f1 -----  
 SPO1 125.7603047 MHz  
 NUC1 13C  
 P1 8.90 usec  
 PLW1 29.00000000 W

----- CHANNEL f2 -----  
 SPO2 500.0920004 MHz  
 NUC2 1H  
 CPDPRG2 waltz16  
 PCPD2 80.00 usec  
 PLW2 17.00000000 W  
 PLW12 0.52061999 W  
 PLW13 0.33320001 W

F2 - Processing parameters  
 SI 32768  
 SF 125.7477210 MHz  
 WDW EM  
 SSB 0  
 LB 1.00 Hz  
 GB 0  
 PC 1.40

112.42911625

Indian Institute of Technology, Gandhinagar.0.0000000

SYNAPT G2-S#NotSet  
10-Jul-201422:15:43  
1: TOF MS ES+  
3.18e6

ITGN\_100714\_007 1426 (12.429) Cm (1414:1442-(1256:1361+1521:1548))

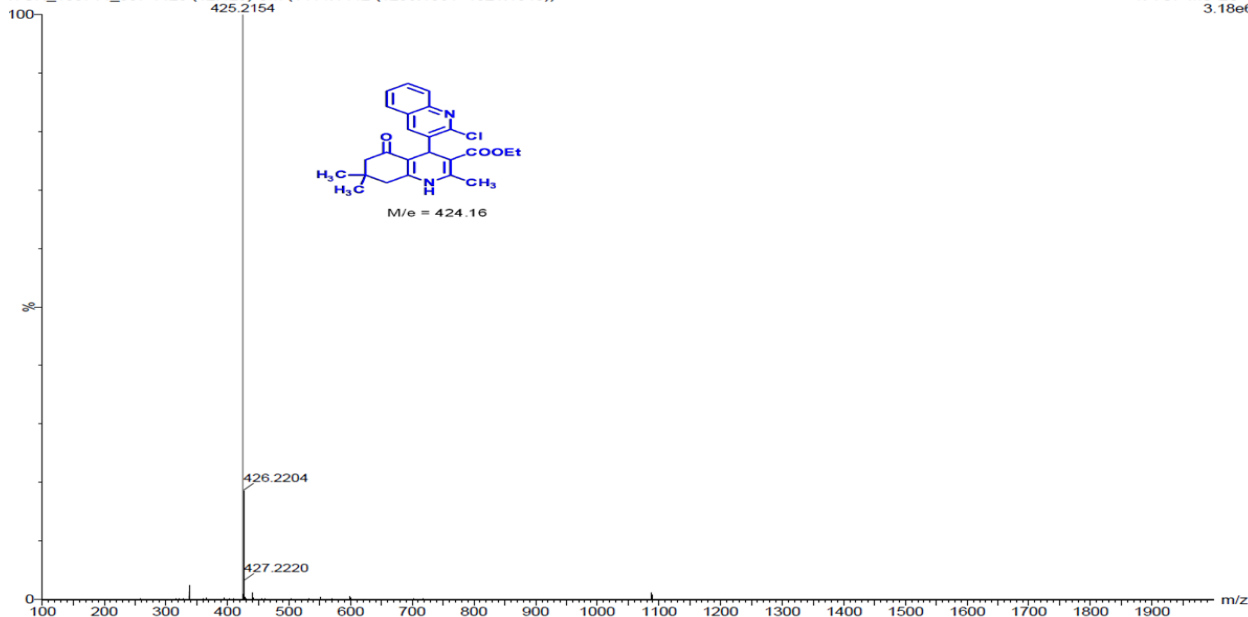

### Ethyl 2,7,7-trimethyl-5-oxo-4-(4-oxo-4H-chromene-3-yl)-1,4,5,6,7,8-hexahydroquinoline-3-carboxylate (31):

DK-BPL-01-034

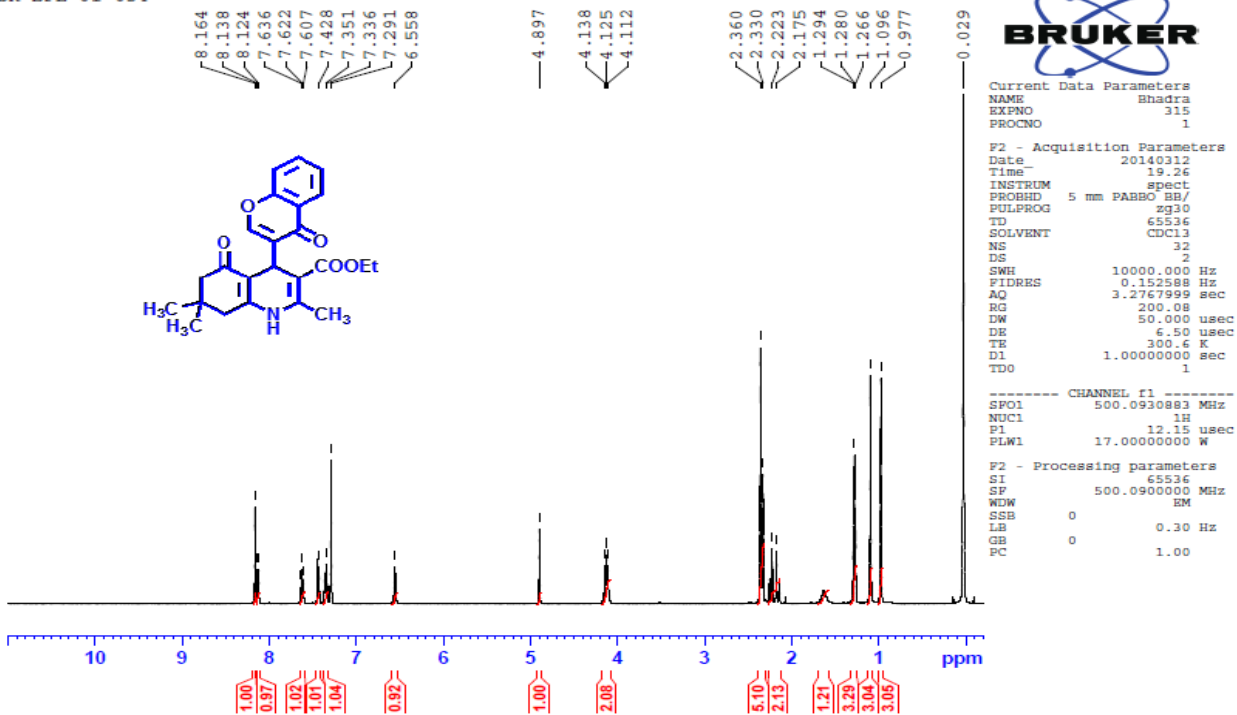



DK-BPL-01-034

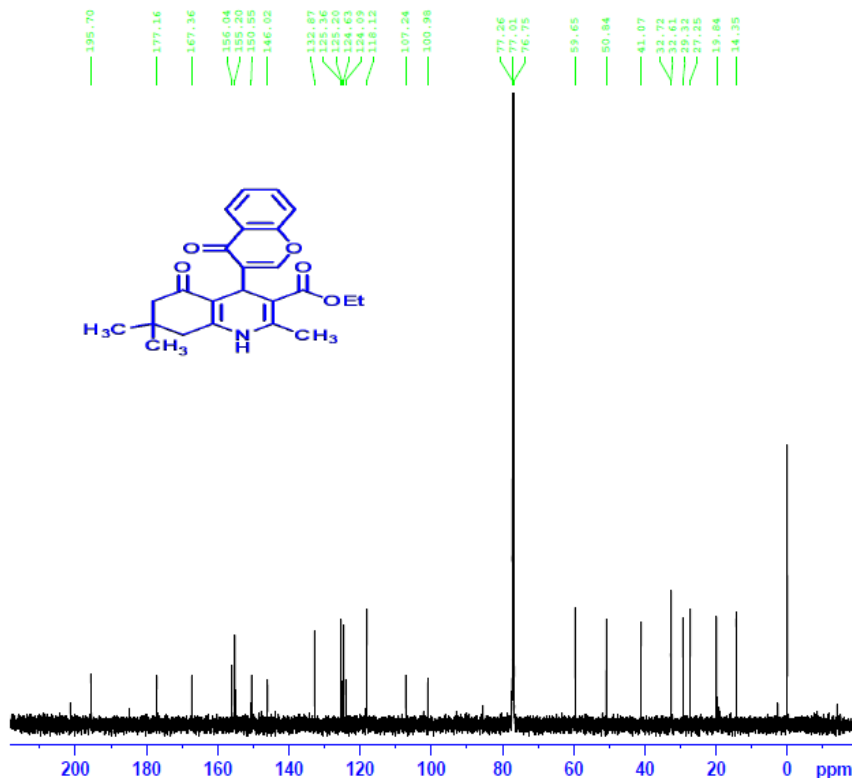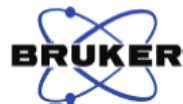

Current Data Parameters  
 NAME Bhadra  
 EXPNO 956  
 PROCNO 1

F2 - Acquisition Parameters  
 Date\_ 20140712  
 Time 20.38  
 INSTRUM spect  
 PROBHD 5 mm PABBO BB/  
 PULPROG zgpg30  
 TD 65536  
 SOLVENT CDCl3  
 NS 1024  
 DS 4  
 SWH 29761.904 Hz  
 FIDRES 0.454131 Hz  
 AQ 1.1010048 sec  
 RG 112.97  
 DW 16.800 usec  
 DE 6.50 usec  
 TE 302.6 K  
 D1 2.00000000 sec  
 D11 0.03000000 sec  
 TDO 1

----- CHANNEL f1 -----  
 SP01 125.7603047 MHz  
 NUC1 13C  
 P1 8.90 usec  
 PLW1 29.00000000 W

----- CHANNEL f2 -----  
 SP02 500.0920004 MHz  
 NUC2 1H  
 CPDPRG2 waltz16  
 PCPD2 80.00 usec  
 PLW2 17.00000000 W  
 PLW12 0.52061999 W  
 PLW13 0.33320001 W

F2 - Processing parameters  
 SI 32768  
 SF 125.7477310 MHz  
 WDW EM  
 SSB 0  
 LB 1.00 Hz  
 GB 0  
 PC 1.40

NAG 348.22875023

Indian Institute of Technology, Gandhinagar0.00000000

SYNAPT G2-S#NotSet  
 01-Jun-201423:15:44  
 1: TOF MS ES+  
 4.96e6

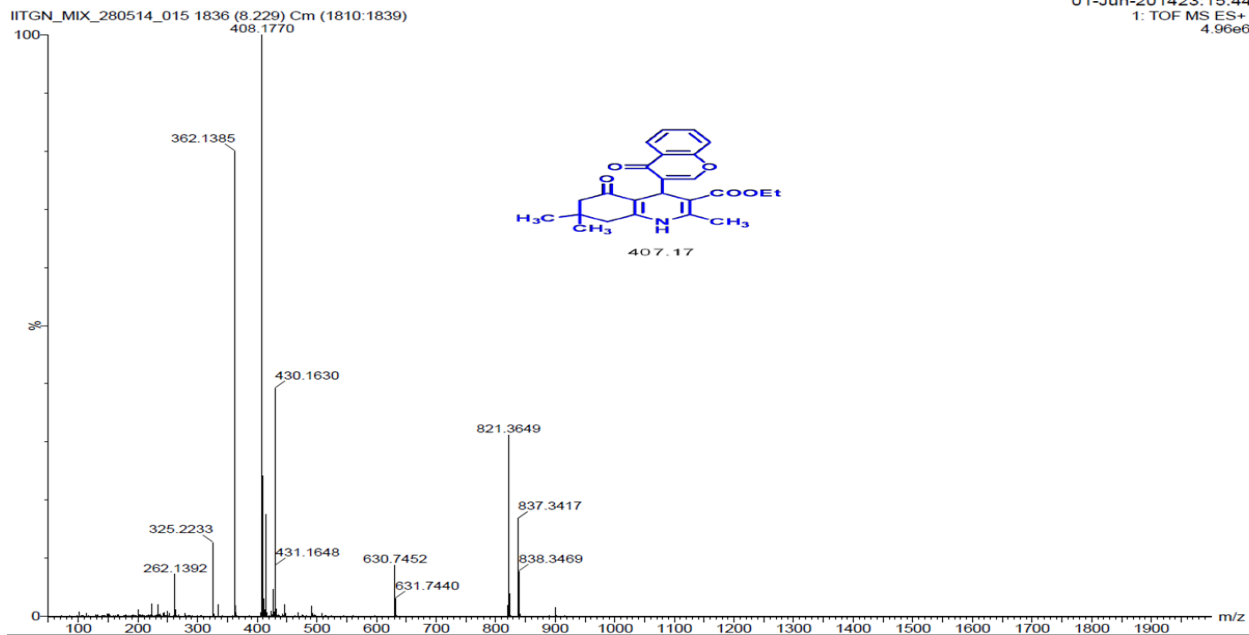

## 2-amino-4,7,7-trimethyl-5-oxo-5,6,7,8-tetrahydro-4H-chromene-3-carbonitrile (35):

DK-BPL-01-105

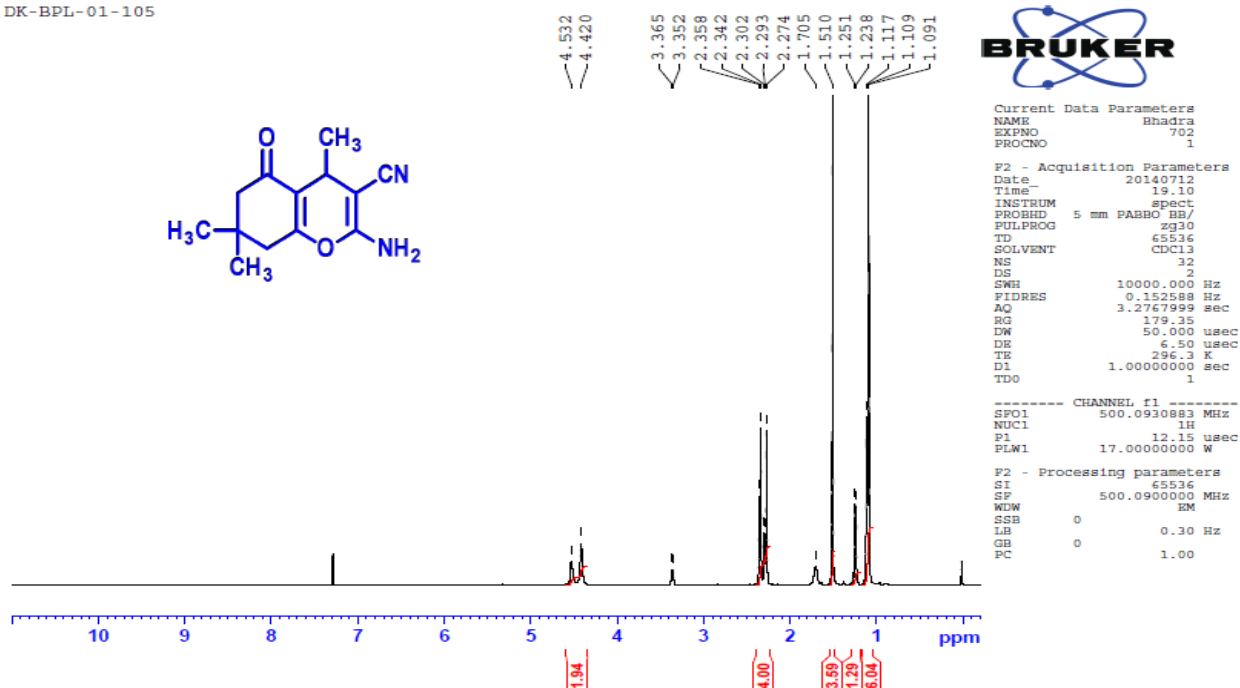

DK-BPL-01-105

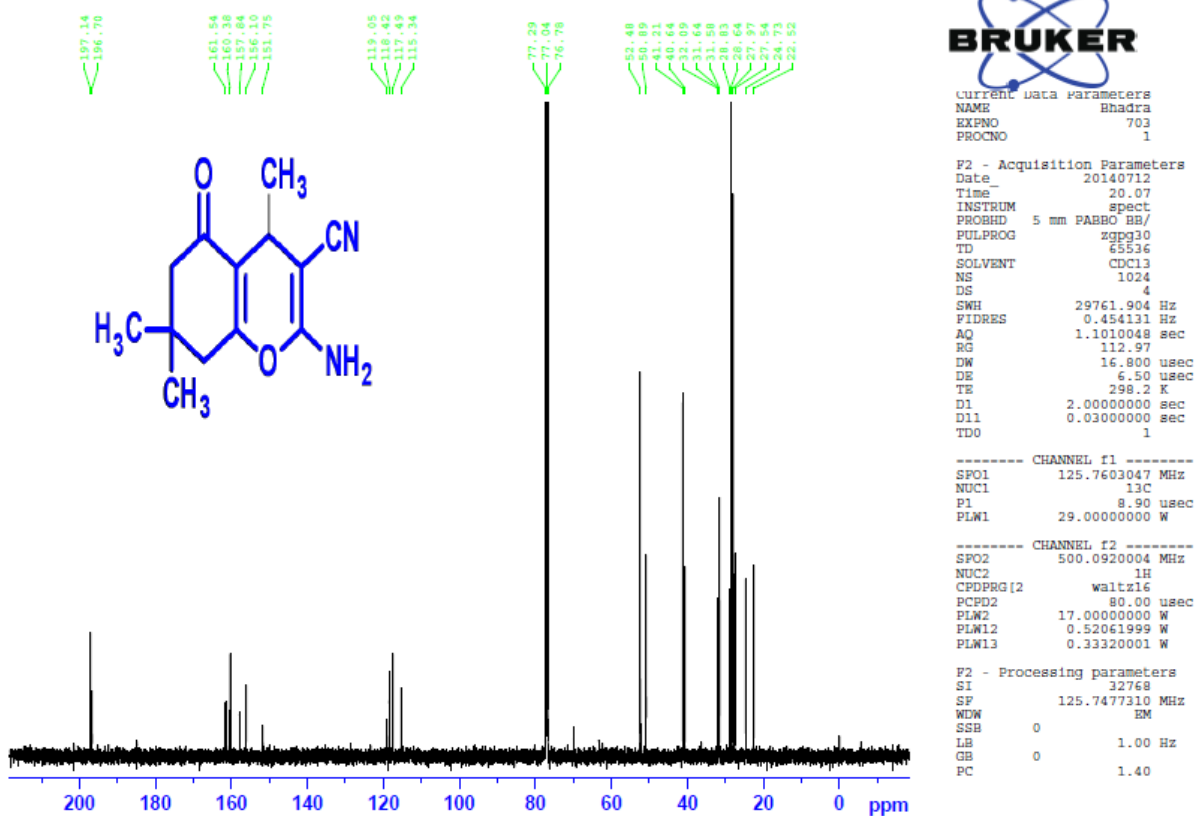

1058.46226692

Indian Institute of Technology, Gandhinagar0.0000000

SYNAPT G2-S#NotSet  
12-Jul-201414:35:23  
1: TOF MS ES+  
5.74e4

ITGN\_MIX\_070714\_050 970 (8.462)  
233.1243

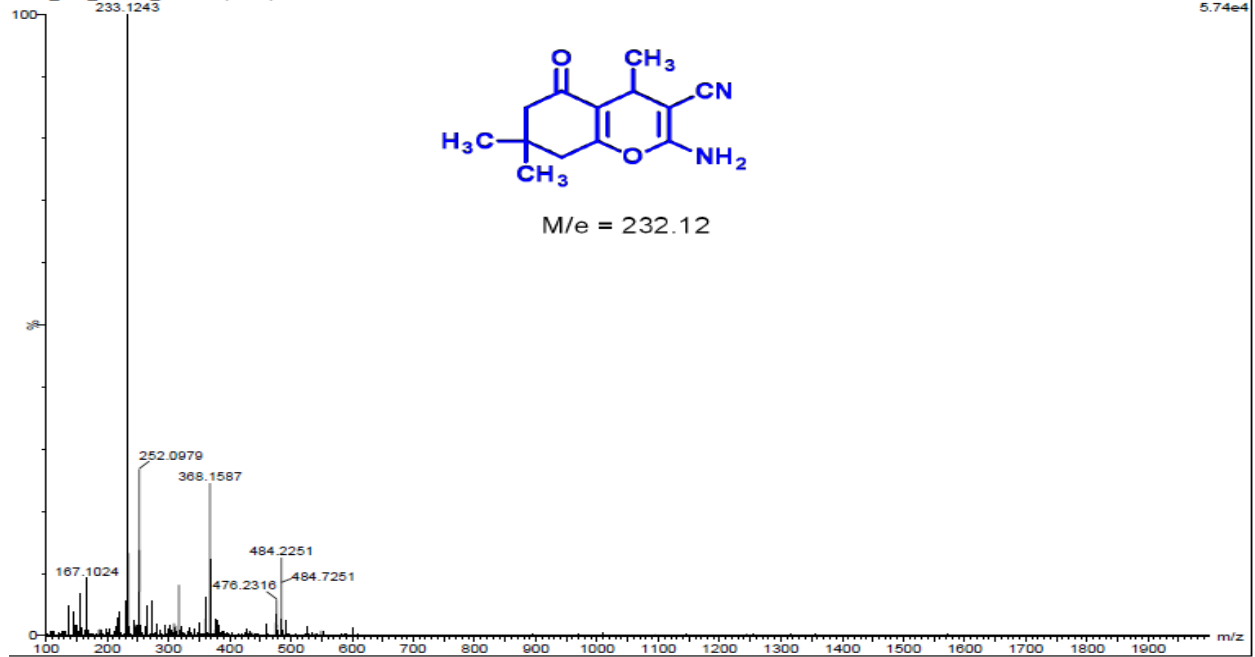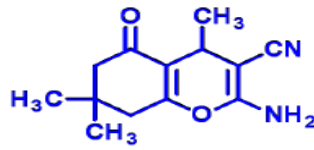

M/e = 232.12

### 2-amino-4-(2-chloroquinoline-3-yl)-7,7-dimethyl-5-oxo-5,6,7,8-tetrahydro-4H-3-carbonitrile (43):

JK-BPL-01-030

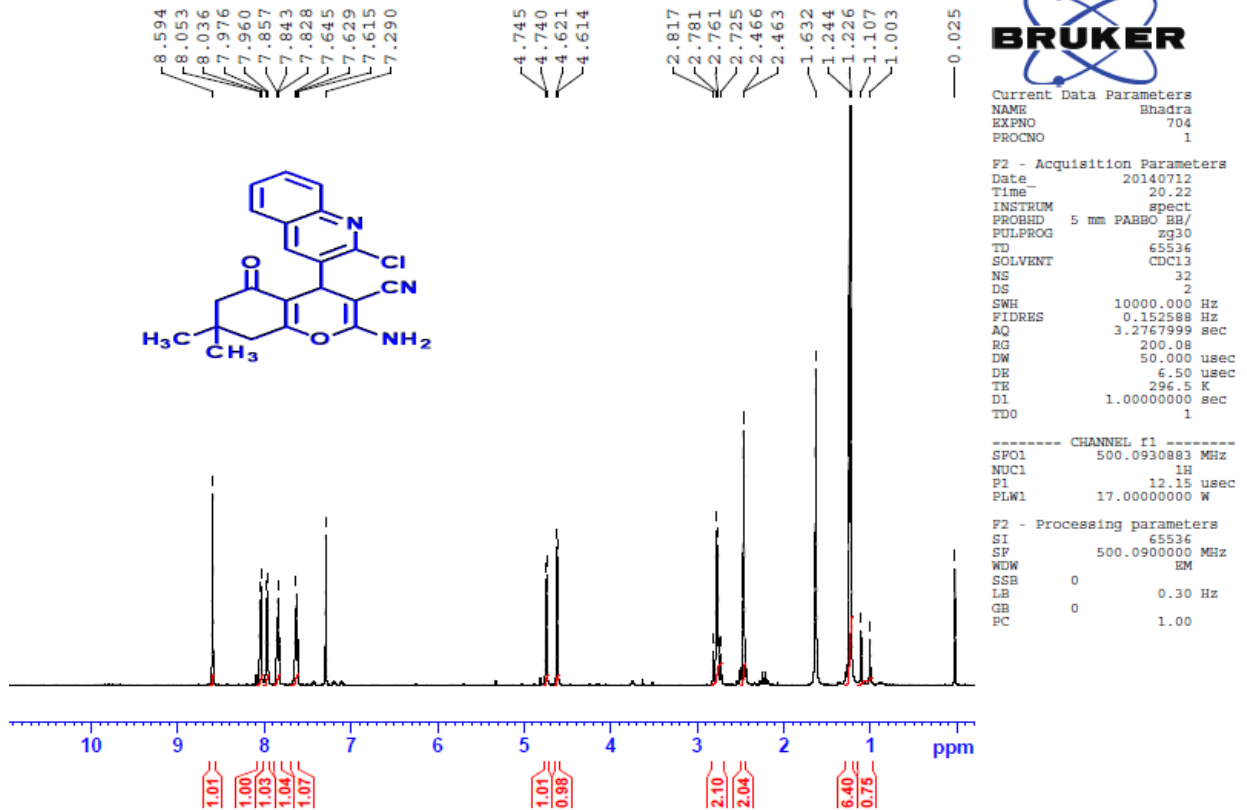

DK-BPL-01-030

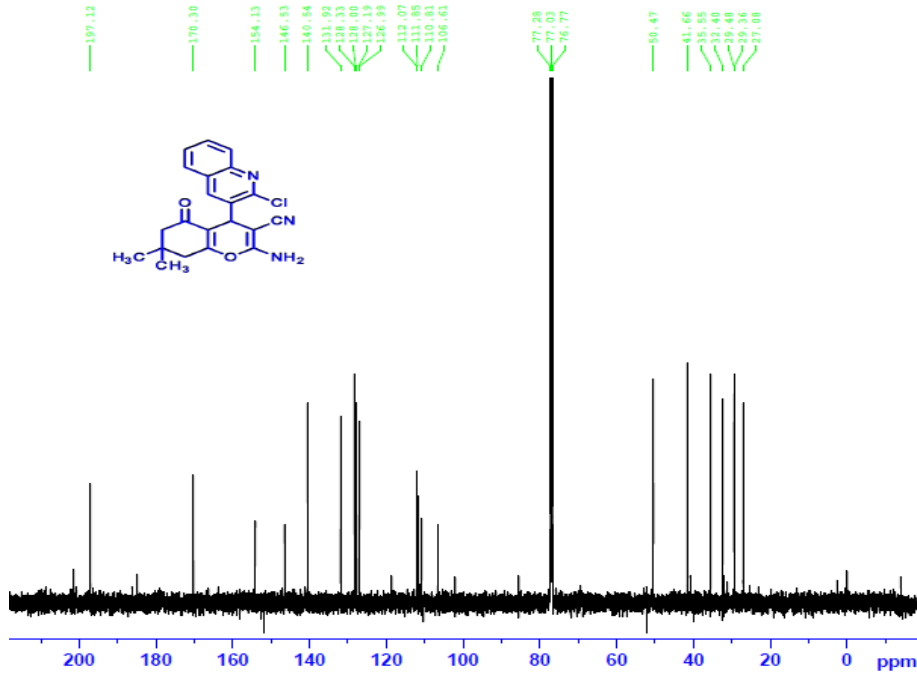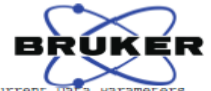

Current Data parameters  
 NAME Bhadra  
 EXPNO 705  
 PROCNO 1

F2 - Acquisition Parameters  
 Date 20140712  
 Time 20.27  
 INSTRUM spect  
 PROBHD 5 mm PABBO BB/  
 PULPROG zgpg30  
 TD 65536  
 SOLVENT CDCl3  
 NS 1024  
 DS 4  
 SWH 29761.904 Hz  
 FIDRES 0.454131 Hz  
 AQ 1.1010048 sec  
 RG 112.97  
 DW 16.800 usec  
 DE 6.50 usec  
 TE 297.5 K  
 D1 2.0000000 sec  
 D11 0.0300000 sec  
 TDO 1

----- CHANNEL f1 -----  
 SFO1 125.7603047 MHz  
 NUC1 13C  
 P1 8.90 usec  
 PLW1 29.00000000 W

----- CHANNEL f2 -----  
 SFO2 500.0920004 MHz  
 NUC2 1H  
 CPDPRG2 waltz16  
 PCPD2 80.00 usec  
 PLW2 17.00000000 W  
 PLW12 0.52061999 W  
 PLW13 0.33320001 W

F2 - Processing parameters  
 SI 32768  
 SF 125.7477310 MHz  
 WDW EM  
 SSB 0  
 LB 1.00 Hz  
 GB 0  
 PC 1.40

NAG 308.19801712

Indian Institute of Technology, Gandhinagar.0.00000000

SYNAPT G2-S#NotSet  
 02-Jun-2014 17:44:51  
 1: TOF MS ES+  
 2.21e7

IITGN\_MIX\_280514\_023 1829 (8 198) Cm (1809:1866)

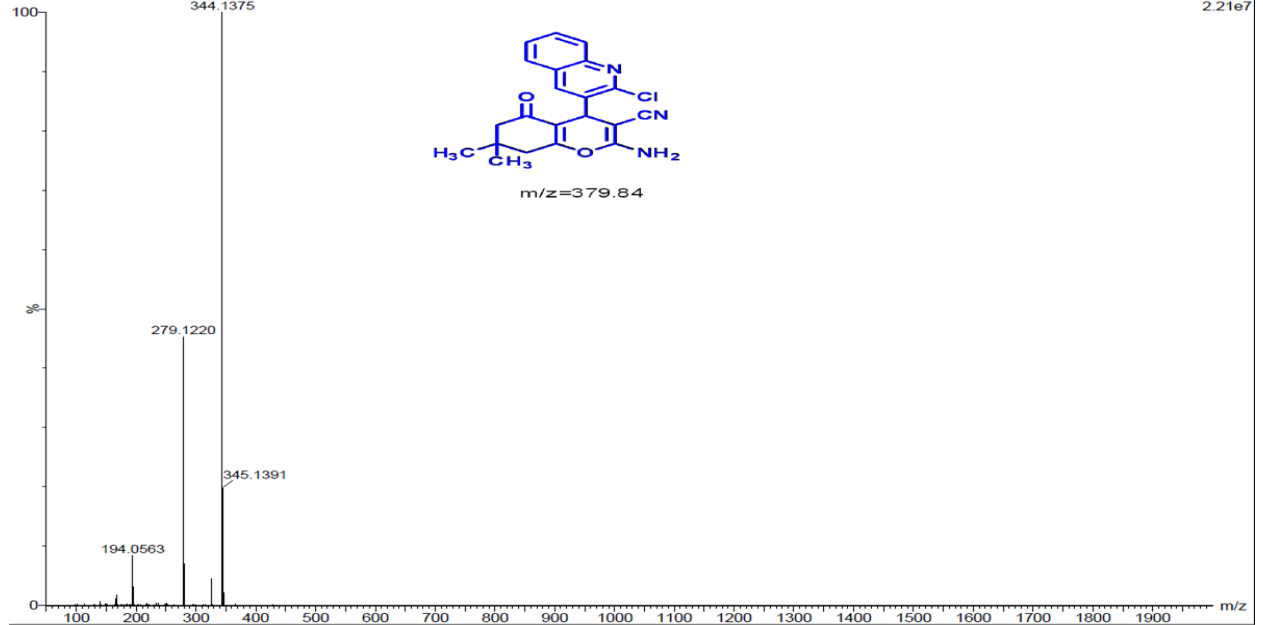

**2-amino-7,7-dimethyl-4,5-dioxo-5,6,7,8-tetrahydro-4H,4'H-(3,4'-bichromene)-3-carbonitrile (45):**

DK-BPL-01-029

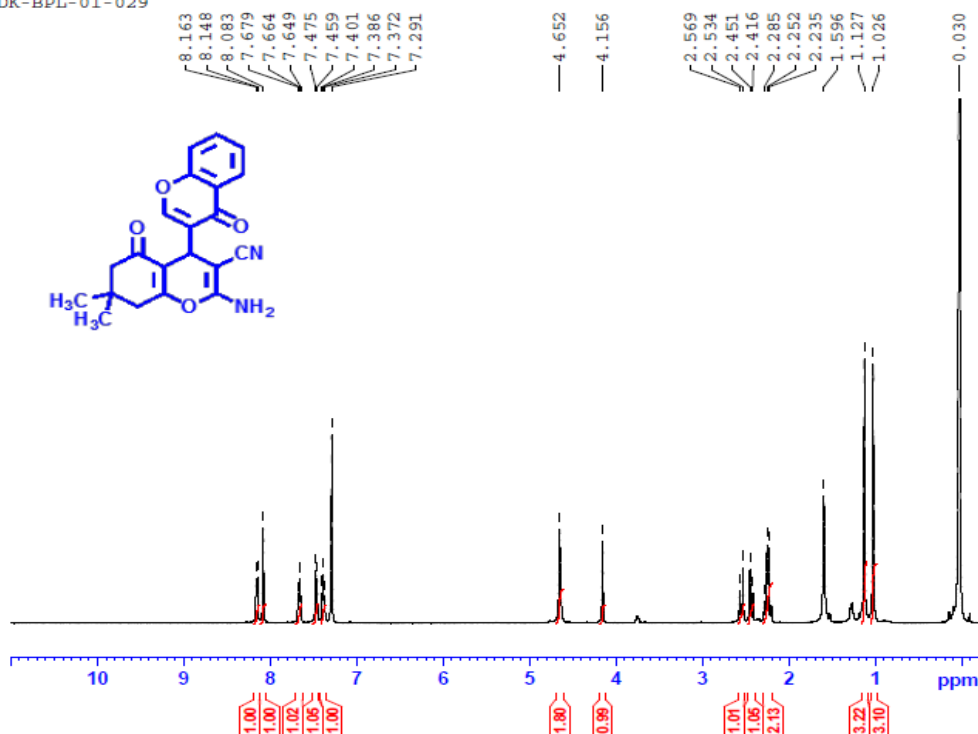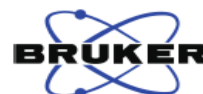

Current Data Parameters  
 NAME Bhadra  
 EXPNO 558  
 PROCNO 1

F2 - Acquisition Parameters  
 Date\_ 20140313  
 Time 15.32  
 INSTRUM spect  
 PROBHD 5 mm PABBO BB/  
 PULPROG zg30  
 TD 65536  
 SOLVENT CDCl3  
 NS 32  
 DS 2  
 SWH 10000.000 Hz  
 FIDRES 0.152588 Hz  
 AQ 3.276999 sec  
 RG 200.08  
 DW 50.000 usec  
 DE 6.50 usec  
 TE 300.7 K  
 D1 1.00000000 sec  
 TDO 1

----- CHANNEL f1 -----  
 SF01 500.0930883 MHz  
 NUCL1 1H  
 P1 12.15 usec  
 PLW1 17.00000000 W

F2 - Processing parameters  
 SI 65536  
 SF 500.0900000 MHz  
 WDW EM  
 SSB 0  
 LB 0.30 Hz  
 GB 0  
 PC 1.00

NAG 292.83273339

Indian Institute of Technology, Gandhinagar0.00000000

SYNAPT G2-S#NotSet  
 02-Jun-2014 17:02:25  
 1: TOF MS ES+  
 4.46e6

IITGN\_MIX\_280514\_021 629 (2.833) Cm (624:657)

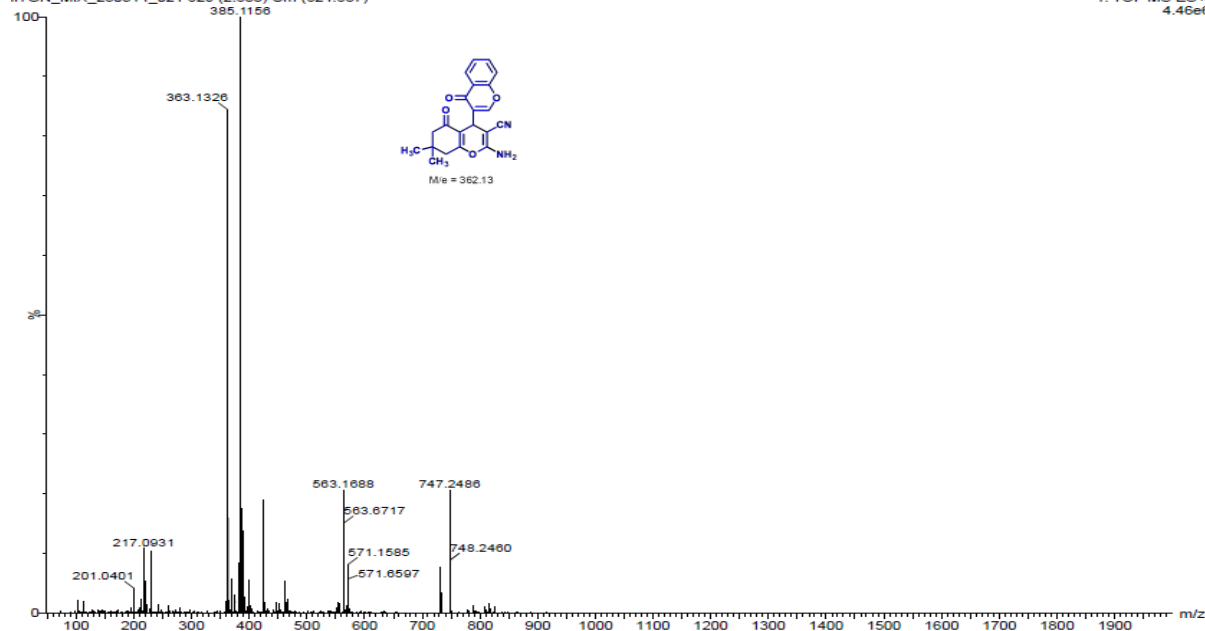

### 3-amino-1-(4-oxo-4H-chromene-3-yl)-1H-benzo(f)chromene-2-carbonitrile(60):

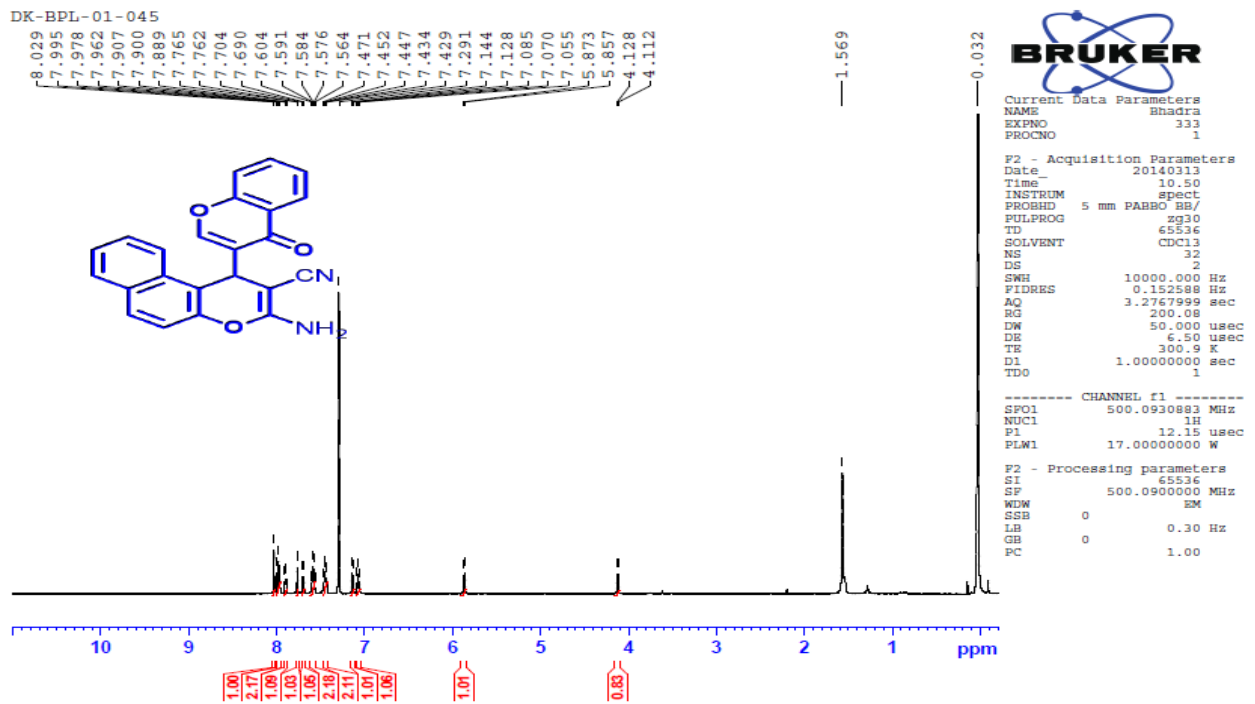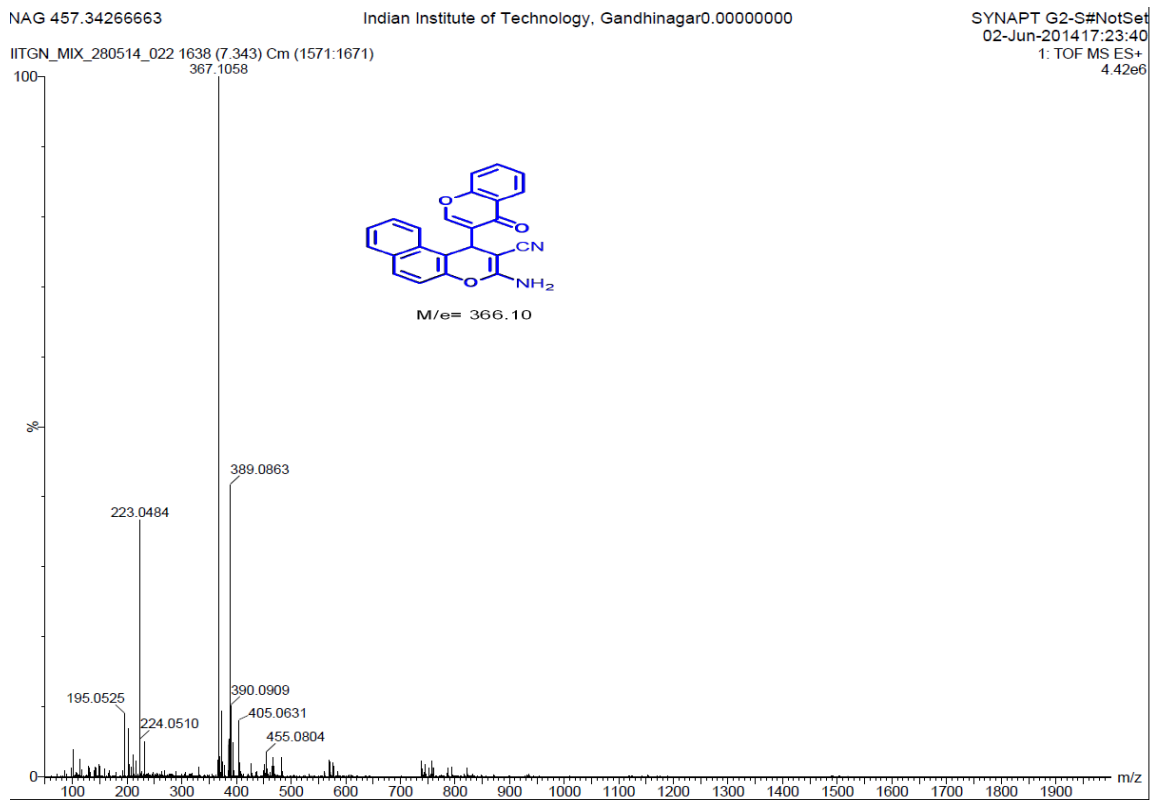

Supplement: c4ra07708c1.pdf [file c4ra07708c1.pdf]
